# Supplementary material for: A framework for community curation of interspecies interactions literature
Source: eLife. 2023 Jul 4;12:e84658. doi: 10.7554/eLife.84658 (PMC10319440; doi:10.7554/eLife.84658)
Supplement: Supplementary file 2. [file elife-84658-supp2.xlsx]

## Sheet: Annotation extensions
Supplementary file 2. PomBase annotation extensions also used in PHI-Canto.
Annotation type	Annotation extension name
GO biological process	PR:nnn ID for gene product form
	acetylation of
	exports
	folds
	glycosylation of
	happens during
	involved in degradation of
	localizes
	maintains location of
	occurs at
	phosphorylation of
	processes
	qualifier
	regulates acetylation of
	regulates activity of
	regulates binding between
	regulates catabolism of
	regulates localization of
	regulates modification of
	regulates processing of
	regulates targeting of
	regulates transcription of
	regulates transport of
	silences
	stabilizes
	targets
	transports
GO cellular component	PR:nnn ID for gene product form
	found at genomic region
	observed in this location during (cell cycle phase or stress response)
	qualifier
GO molecular function	PR:nnn ID for gene product form
	active in
	acts on
	anchors
	binds (PR:nnn ID for bound protein form)
	binds (RNA gene or type)
	binds chromatin region
	binds ligand
	binds region
	chaperone for
	cleaves
	deacetylates
	dephosphorylates
	deubiquitinates
	exchange factor for
	has function during
	has input
	has ligand (protein or chemical substance)
	involved in biological process
	isomerizes
	methylates
	modifies
	palmitoylates
	phosphorylates
	prenylates
	qualifier
	recruits
	regulates activity of
	regulates activity of transcription factor
	regulates transcription of
	sequesters
	transports
	transports (protein or RNA)
	ubiquitinates
	uridylylates
RNA level	during
	in presence of
Protein Modification	absent during
	added by
	added during
	cellular amount of modification fluctuates during
	position modified
	present during
	proportion of proteins with modification
	removed by
	removed during
	required for activity
	required for process
