# Supplementary material for: A framework for community curation of interspecies interactions literature
Source: eLife. 2023 Jul 4;12:e84658. doi: 10.7554/eLife.84658 (PMC10319440; doi:10.7554/eLife.84658)
Supplement: Supplementary file 4. [file elife-84658-supp4.xlsx]

## Sheet: Description
Supplementary file 4. PHI-Canto species and strain lists for pathogens and hosts.
This workbook contains lists of pathogen and host species and strains that are used in PHI-Canto. The species and strains were extracted from data already curated in PHI-base version 4. Note that this list does not constrain the choices of data available to curators, since curators are free to enter an accession from any species in UniProtKB into PHI-Canto, and curators may also enter their own s…
Sheet	Column	Description
Pathogen species	ncbi_taxid	The NCBI Taxonomy identifier of the pathogen species.
	scientific_name	The scientific name of the pathogen species, as it appears in PHI-base.
	common_name	The common name (if any) of the pathogen species, as it appears in PHI-base.
Host species	ncbi_taxid	The NCBI Taxonomy identifier for the host species.
	scientific_name	The scientific name of the host species, as it appears in PHI-base.
	common_name	The common name (if any) of the host species, as it appears in PHI-base.
Pathogen strains	ncbi_taxid	The NCBI Taxonomy identifier of the pathogen species corresponding to the strain.
	scientific_name	The scientific name of the pathogen species corresponding to the strain.
	strain	The primary name of the pathogen strain.
	synonyms	Synonymous names of the primary pathogen strain name, as curated by PHI-base.
	cross_references	Cross-references to identifiers from other biological databases or ontologies. Currently unused for pathogen strains.
Host strains	ncbi_taxid	The NCBI Taxonomy identifier of the host species corresponding to the strain.
	scientific_name	The scientific name of the host species corresponding to the strain.
	strain	The primary name of the host strain.
	synonyms	Synonymous names of the primary host strain name, as curated by PHI-base.
	cross_references	Cross-references to identifiers from other biological databases or ontologies: 'CVCL' for Cellosaurus, 'BTO' for the BRENDA Tissue Ontology, 'WBStrain' for WormBase, and 'MGI' for Mouse Genome Informatics.

## Sheet: Pathogen species
ncbi_taxid	scientific_name	common_name
470	Acinetobacter baumannii
106654	Acinetobacter nosocomialis
715	Actinobacillus pleuropneumoniae
644	Aeromonas hydrophila
645	Aeromonas salmonicida
358	Agrobacterium tumefaciens
373	Agrobacterium vitis
5599	Alternaria alternata
29001	Alternaria brassicicola
135859	Alternaria citri
160389	Alternaria longipes
48100	Alternaria solani
13349	Arthrobotrys oligospora
5454	Ascochyta rabiei
40993	Aspergillus carbonarius
5059	Aspergillus flavus
746128	Aspergillus fumigatus
162425	Aspergillus nidulans
728	Avibacterium paragallinarum
1392	Bacillus anthracis	anthrax bacterium
1396	Bacillus cereus
176275	Beauveria bassiana
5016	Bipolaris maydis	southern corn leaf blight pathogen
101162	Bipolaris oryzae
45130	Bipolaris sorokiniana
40125	Bipolaris victoriae
5017	Bipolaris zeicola
5039	Blastomyces dermatitidis
34373	Blumeria graminis	grass mildew
518	Bordetella bronchiseptica
520	Bordetella pertussis
139	Borrelia burgdorferi	Lyme disease spirochete
140	Borrelia hermsii
40559	Botrytis cinerea
278938	Botrytis elliptica
4779	Bremia lactucae	lettuce downy mildew
235	Brucella abortus
29459	Brucella melitensis
444163	Brucella microti
29461	Brucella suis
95486	Burkholderia cenocepacia
292	Burkholderia cepacia
488447	Burkholderia contaminans
337	Burkholderia glumae
13373	Burkholderia mallei
28450	Burkholderia pseudomallei
57975	Burkholderia thailandensis
6326	Bursaphelenchus xylophilus	pine wood nematode
197	Campylobacter jejuni
5476	Candida albicans
42374	Candida dubliniensis
5478	Candida glabrata
5480	Candida parapsilosis
5482	Candida tropicalis
5158	Ceratocystis fimbriata
312341	Ceratocystis harringtonii
132184	Cercospora apii
122368	Cercospora beticola
84275	Cercospora kikuchii
29003	Cercospora nicotianae
135779	Cercospora zeae-maydis
83560	Chlamydia muridarum	agent of mouse pneumonitis
83558	Chlamydia pneumoniae
813	Chlamydia trachomatis
67825	Citrobacter rodentium
28447	Clavibacter michiganensis
5111	Claviceps purpurea	ergot fungus
36911	Clavispora lusitaniae
1496	Clostridioides difficile
1502	Clostridium perfringens
5501	Coccidioides immitis
199306	Coccidioides posadasii
27357	Colletotrichum acutatum
27358	Colletotrichum coccodes
474922	Colletotrichum gloeosporioides
31870	Colletotrichum graminicola
80884	Colletotrichum higginsianum
5462	Colletotrichum lagenaria
1585795	Colletotrichum lentis
290576	Colletotrichum lindemuthianum
5465	Colletotrichum orbiculare
5466	Colletotrichum trifolii
1717	Corynebacterium diphtheriae
65058	Corynebacterium ulcerans
777	Coxiella burnetii
413502	Cronobacter turicensis
535744	Cronobacter universalis
5116	Cryphonectria parasitica	chestnut blight fungus
552467	Cryptococcus gattii
5207	Cryptococcus neoformans
5503	Curvularia lunata
43	Cystobacter fuscus
430498	Dactylellina haptotyla
204038	Dickeya dadantii
1089444	Dickeya solani
64363	Dothistroma septosporum
67780	Edwardsiella ictaluri
636	Edwardsiella tarda
1351	Enterococcus faecalis
1352	Enterococcus faecium
35717	Epichloe festucae
552	Erwinia amylovora
562	Escherichia coli	E. coli
5970	Exophiala dermatitidis
96345	Flavobacterium psychrophilum
263	Francisella tularensis
282267	Fusarium asiaticum
5516	Fusarium culmorum
5127	Fusarium fujikuroi
5518	Fusarium graminearum
5507	Fusarium oxysporum
948311	Fusarium proliferatum	bulb rot disease fungus
101028	Fusarium pseudograminearum
5128	Fusarium sambucinum
169388	Fusarium solani
5514	Fusarium sporotrichioides
117187	Fusarium verticillioides
232082	Fusarium virguliforme
29850	Gaeumannomyces graminis
738	Glaesserella parasuis
36090	Globodera pallida
31243	Globodera rostochiensis
5563	Gloeocercospora sorghi
226899	Grosmannia clavigera
730	Haemophilus ducreyi
727	Haemophilus influenzae
210	Helicobacter pylori
13563	Heterobasidion annosum
51029	Heterodera glycines	soybean cyst nematode
5037	Histoplasma capsulatum
272952	Hyaloperonospora arabidopsidis
504	Kingella kingae
573	Klebsiella pneumoniae
4922	Komagataella pastoris
1358	Lactococcus lactis
93591	Lecanicillium fungicola
446	Legionella pneumophila
5671	Leishmania infantum
5664	Leishmania major
5665	Leishmania mexicana
5022	Leptosphaeria maculans	blackleg of rapeseed fungus
173	Leptospira interrogans
1639	Listeria monocytogenes
71657	Lonsdalea quercina
13131	Macrosiphum euphorbiae	potato aphid
318829	Magnaporthe oryzae	rice blast fungus
203908	Melampsora larici-populina
5261	Melampsora lini	flax rust
6303	Meloidogyne javanica	root-knot nematode
92637	Metarhizium acridum
5530	Metarhizium anisopliae
568076	Metarhizium robertsii
1682391	Microdochium sorghi
38448	Monilinia fructicola
153609	Moniliophthora perniciosa
552546	Muricauda olearia
36809	Mycobacterium abscessus
1764	Mycobacterium avium
1781	Mycobacterium marinum
1772	Mycobacterium smegmatis
1773	Mycobacterium tuberculosis
1774	Mycobacteroides chelonae
2110	Mycoplasma agalactiae
28903	Mycoplasma bovis
2096	Mycoplasma gallisepticum
13164	Myzus persicae	green peach aphid
140110	Nectria haematococca
485	Neisseria gonorrhoeae
487	Neisseria meningitidis
2813651	Orbilia oligospora
1464	Paenibacillus larvae
553	Pantoea ananatis
66269	Pantoea stewartii
121759	Paracoccidioides brasiliensis
13684	Parastagonospora nodorum
5499	Passalora fulva
29471	Pectobacterium atrosepticum
180957	Pectobacterium brasiliense
554	Pectobacterium carotovorum
55208	Pectobacterium wasabiae
36651	Penicillium digitatum
27334	Penicillium expansum
230439	Peronospora tabacina
38293	Photobacterium damselae
29488	Photorhabdus luminescens
29920	Phytophthora cactorum
4784	Phytophthora capsici
4787	Phytophthora infestans	potato late blight agent
4792	Phytophthora parasitica
67593	Phytophthora sojae
5821	Plasmodium berghei
5833	Plasmodium falciparum	malaria parasite P. falciparum
837	Porphyromonas gingivalis
584	Proteus mirabilis
1873960	Pseudocercospora fijiensis
685502	Pseudocercospora fuligena
287	Pseudomonas aeruginosa
47877	Pseudomonas amygdali
86840	Pseudomonas cannabina
36746	Pseudomonas cichorii
294	Pseudomonas fluorescens
50340	Pseudomonas fuscovaginae
29438	Pseudomonas savastanoi
317	Pseudomonas syringae
29442	Pseudomonas tolaasii
285811	Pseudopyrenochaeta lycopersici
5297	Puccinia graminis
27350	Puccinia striiformis
76659	Pyrenopeziza brassicae
53485	Pyrenophora teres	barley net-spot blotch disease agent
45151	Pyrenophora tritici-repentis
65070	Pythium aphanidermatum
46012	Radopholus similis	banana-root nematode
329	Ralstonia pickettii
305	Ralstonia solanacearum
456999	Rhizoctonia solani
64495	Rhizopus oryzae
914237	Rhynchosporium commune
34085	Riemerella anatipestifer
77044	Rosellinia necatrix
4932	Saccharomyces cerevisiae	baker's yeast
28901	Salmonella enterica
5180	Sclerotinia sclerotiorum
39703	Septoria lycopersici	tomato leaf spot fungus
615	Serratia marcescens
93612	Setosphaeria turcica	northern corn leaf blight
623	Shigella flexneri
1280	Staphylococcus aureus
1282	Staphylococcus epidermidis
28035	Staphylococcus lugdunensis
29385	Staphylococcus saprophyticus
40324	Stenotrophomonas maltophilia
1311	Streptococcus agalactiae
1336	Streptococcus equi
1346	Streptococcus iniae
1309	Streptococcus mutans
1348	Streptococcus parauberis
1313	Streptococcus pneumoniae
1314	Streptococcus pyogenes
36470	Streptococcus sp. 'group A'
1307	Streptococcus suis
1349	Streptococcus uberis
1930	Streptomyces scabiei
85558	Streptomyces turgidiscabies
286115	Synchytrium endobioticum
5811	Toxoplasma gondii
158	Treponema denticola
29875	Trichoderma virens
523103	Trichophyton mentagrophytes
5551	Trichophyton rubrum
5691	Trypanosoma brucei
5693	Trypanosoma cruzi
1159556	Ustilaginoidea virens
120017	Ustilago hordei
5270	Ustilago maydis
105487	Valsa mali
5025	Venturia inaequalis
27337	Verticillium dahliae
100787	Verticillium longisporum
28171	Vibrio aestuarianus
55601	Vibrio anguillarum
680	Vibrio campbellii
666	Vibrio cholerae
669	Vibrio harveyi
670	Vibrio parahaemolyticus
212663	Vibrio tasmaniensis
672	Vibrio vulnificus
29447	Xanthomonas albilineans
53413	Xanthomonas axonopodis
339	Xanthomonas campestris
346	Xanthomonas citri
456327	Xanthomonas euvesicatoria
56454	Xanthomonas hortorum
347	Xanthomonas oryzae
343	Xanthomonas translucens
628	Xenorhabdus nematophila
2371	Xylella fastidiosa
630	Yersinia enterocolitica
632	Yersinia pestis
633	Yersinia pseudotuberculosis
29486	Yersinia ruckeri
1047171	Zymoseptoria tritici

## Sheet: Host species
ncbi_taxid	scientific_name	common_name
5755	Acanthamoeba castellanii
5757	Acanthamoeba polyphaga
61970	Acipenser sinensis	Chinese sturgeon
3625	Actinidia chinensis
7029	Acyrthosiphon pisum	pea aphid
7084	Adalia bipunctata	two-spotted ladybird beetle
7159	Aedes aegypti	yellow fever mosquito
108276	Aeschynomene virginica
5341	Agaricus bisporus	cultivated mushroom
176616	Ageratina adenophora
4679	Allium cepa	onion
8839	Anas platyrhynchos	mallard
7936	Anguilla anguilla	European eel
30069	Anopheles stephensi	Asian malaria mosquito
226677	Anthurium andraeanum	oilcloth-flower
7460	Apis mellifera	honey bee
4045	Apium graveolens
3702	Arabidopsis thaliana	thale cress
3818	Arachis hypogaea	peanut
6661	Artemia franciscana	brine shrimp
85549	Artemia salina
39291	Athelia rolfsii
4498	Avena sativa	oat
38783	Avena strigosa	black oat
28974	Averrhoa carambola
161934	Beta vulgaris	sugar beet
7091	Bombyx mori	domestic silkworm
9913	Bos taurus	cattle
15368	Brachypodium distachyon	stiff brome
52824	Brassica carinata	Ethiopian mustard
3707	Brassica juncea	brown mustard
3708	Brassica napus	rape
3712	Brassica oleracea	wild cabbage
3711	Brassica rapa	field mustard
6239	Caenorhabditis elegans	roundworm
9612	Canis lupus	gray wolf
4072	Capsicum annuum
4073	Capsicum frutescens	hot pepper
217509	Carassius carassius	crucian carp
134033	Castanea dentata	American chestnut
60419	Castanea mollissima	Chinese chestnut
21020	Castanea sativa	European chestnut
10141	Cavia porcellus	domestic guinea pig
63459	Chenopodium quinoa	quinoa
10152	Chinchilla chinchilla	short-tailed chinchilla
34839	Chinchilla lanigera	long-tailed chinchilla
9534	Chlorocebus aethiops	grivet
41568	Chrysanthemum x morifolium	mum
189513	Chrysoperla carnea
3827	Cicer arietinum	chickpea
13427	Cichorium intybus	chicory
3654	Citrullus lanatus	wild melon
159033	Citrus aurantiifolia	lime
79217	Citrus iyo
64884	Citrus jambhiri	rough lemon
2708	Citrus limon	lemon
171249	Citrus limonia	yi mu zi
37656	Citrus paradisi	grapefruit
85571	Citrus reticulata	tangerine
2711	Citrus sinensis	sweet orange
55188	Citrus unshiu	satsuma mandarin
164113	Citrus x microcarpa	calamondin
229630	Citrus x tangelo
269719	Cotinus coggygria	smokebush
292731	Cotinus obovatus
2567903	Coturnix coromandelica	rain quail
29159	Crassostrea gigas	Pacific oyster
6565	Crassostrea virginica	eastern oyster
39473	Cucumis anguria	gherkin
3656	Cucumis melo	muskmelon
3659	Cucumis sativus	cucumber
3661	Cucurbita maxima	winter squash
3662	Cucurbita moschata	crookneck pumpkin
3663	Cucurbita pepo	vegetable marrow
28977	Cunninghamia lanceolata	China fir
4265	Cynara cardunculus	wild artichoke
244447	Cynoglossus semilaevis	tongue sole
7955	Danio rerio	zebrafish
35525	Daphnia magna
4039	Daucus carota	carrot
3570	Dianthus caryophyllus	clove pink
44689	Dictyostelium discoideum
7227	Drosophila melanogaster	fruit fly
685034	Dysdercus peruvianus
6396	Eisenia fetida	common brandling worm
9796	Equus caballus	horse
38414	Eragrostis curvula	weeping love grass
32224	Eriobotrya japonica	loquat
4606	Festuca arundinacea	tall fescue
4608	Festuca pratensis	meadow ryegrass
3747	Fragaria ananassa	strawberry
7137	Galleria mellonella	greater wax moth
9031	Gallus gallus	chicken
3847	Glycine max	soybean
3634	Gossypium barbadense	sea-island cotton
3635	Gossypium hirsutum	cotton
6999	Gryllus bimaculatus	two-spotted cricket
4232	Helianthus annuus	common sunflower
29058	Helicoverpa armigera	cotton bollworm
3981	Hevea brasiliensis	para rubber tree
9606	Homo sapiens	human
4513	Hordeum vulgare	barley
336126	Hylocereus trigonus	strawberry-pear
7998	Ictalurus punctatus	channel catfish
6945	Ixodes scapularis	black-legged tick
23013	Kalanchoe daigremontiana	devil's backbone
4236	Lactuca sativa	garden lettuce
4472	Lemna minor
3864	Lens culinaris	lentil
4006	Linum usitatissimum	flax
215539	Liriodendron chinense x Liriodendron tulipifera
7004	Locusta migratoria	migratory locust
4521	Lolium multiflorum	Italian ryegrass
4522	Lolium perenne	perennial ryegrass
7200	Lutzomyia longipalpis
9541	Macaca fascicularis	crab-eating macaque
74068	Macrosteles quadrilineatus	aster leafhopper
3750	Malus domestica	apple
106564	Malus prunifolia
283210	Malus pumila	paradise apple
7130	Manduca sexta	tobacco hornworm
29780	Mangifera indica	mango
3983	Manihot esculenta	cassava
3879	Medicago sativa	lucerne
3880	Medicago truncatula	barrel medic
10047	Meriones unguiculatus	Mongolian gerbil
10036	Mesocricetus auratus	golden hamster
10090	Mus musculus	house mouse
4641	Musa acuminata	dwarf banana
89151	Musa paradisiaca	French plantain banana
63479	Nerium oleander	common oleander
4100	Nicotiana benthamiana
4091	Nicotiana otophora
62141	Nicotiana paniculata
4096	Nicotiana sylvestris	wood tobacco
4097	Nicotiana tabacum	common tobacco
4146	Olea europaea	common olive
8019	Oncorhynchus kisutch	coho salmon
8022	Oncorhynchus mykiss	rainbow trout
8128	Oreochromis niloticus	nile tilapia
9986	Oryctolagus cuniculus	rabbit
4530	Oryza sativa	rice
9940	Ovis aries	sheep
8255	Paralichthys olivaceus	Japanese flounder
4031	Pelargonium hortorum	common geranium
6687	Penaeus monodon	black tiger shrimp
6689	Penaeus vannamei	Pacific white shrimp
6978	Periplaneta americana	American cockroach
3435	Persea americana	avocado
4043	Petroselinum crispum	parsley
3885	Phaseolus vulgaris	string bean
7116	Pieris brassicae	large cabbage white
90988	Pimephales promelas	fathead minnow
3339	Pinus contorta	lodgepole pine
88730	Pinus massoniana	Chinese red pine
3349	Pinus sylvestris	Scots pine
3350	Pinus thunbergii	Japanese black pine
3888	Pisum sativum	pea
51655	Plutella xylostella	diamondback moth
43335	Populus alba	xin bai yang
3690	Populus canadensis	Canadian poplar
1217306	Populus x beijingensis
9310	Potorous tridactylus	long-nosed potoroo
122118	Prunus americana	goose plum
36596	Prunus armeniaca	apricot
42229	Prunus avium	sweet cherry
3758	Prunus domestica	plum
3755	Prunus dulcis	almond
3760	Prunus persica	peach
22663	Punica granatum	pomegranate
23211	Pyrus communis	pear
3767	Pyrus pyrifolia	sha li
3726	Raphanus sativus	radish
10116	Rattus norvegicus	Norway rat
10117	Rattus rattus	black rat
2843217	Rhaphiolepis bibas	loquat
6941	Rhipicephalus microplus	southern cattle tick
456999	Rhizoctonia solani
5537	Rhodotorula mucilaginosa
329032	Riptortus pedestris
267246	Rosa odorata	tea rose
4547	Saccharum officinarum	sugarcane
52904	Scophthalmus maximus	turbot
4550	Secale cereale	rye
7048	Sitophilus oryzae	rice weevil
4108	Solanum chacoense	chaco potato
856898	Solanum huancabambense
4081	Solanum lycopersicum	tomato
4111	Solanum melongena	eggplant
73574	Solanum microdontum
4082	Solanum peruvianum	Peruvian tomato
119830	Solanum torvum	turkey berry
4113	Solanum tuberosum	potato
4558	Sorghum bicolor	sorghum
7107	Spodoptera exigua	beet armyworm
7108	Spodoptera frugiperda	fall armyworm
7109	Spodoptera littoralis	African cotton leafworm
62615	Stylosanthes guianensis	stylo
9823	Sus scrofa	pig
13708	Tagetes erecta	African marigold
7067	Tenebrio molitor	yellow mealworm
3641	Theobroma cacao	cacao
7070	Tribolium castaneum	red flour beetle
96903	Trichogaster trichopterus	three spot gourami
7111	Trichoplusia ni	cabbage looper
4565	Triticum aestivum	bread wheat
4566	Triticum aestivum x Triticum timopheevi
4571	Triticum turgidum	poulard wheat
3906	Vicia faba	fava bean
29760	Vitis vinifera	wine grape
163159	Xenopsylla cheopis	oriental rat flea
69721	Zantedeschia aethiopica	pig-lily
94108	Zantedeschia elliotiana
4577	Zea mays	maize

## Sheet: Pathogen strains
ncbi_taxid	scientific_name	strain	synonyms	cross_references
470	Acinetobacter baumannii	2208	81, ATCC 19606, DSM 6974
470	Acinetobacter baumannii	5377	ATCC 17978, NCDC KC 755
470	Acinetobacter baumannii	AB0057Km
470	Acinetobacter baumannii	Ab169
470	Acinetobacter baumannii	AB5075
470	Acinetobacter baumannii	AB5075_UW
470	Acinetobacter baumannii	ATCC 17903
470	Acinetobacter baumannii	AYE
470	Acinetobacter baumannii	BM4587
470	Acinetobacter baumannii	CI79
470	Acinetobacter baumannii	isolate ST2/KL22
470	Acinetobacter baumannii	MAR002
470	Acinetobacter baumannii	S1
106654	Acinetobacter nosocomialis	M2
715	Actinobacillus pleuropneumoniae	4074
715	Actinobacillus pleuropneumoniae	HS143
715	Actinobacillus pleuropneumoniae	LD20
715	Actinobacillus pleuropneumoniae	MIDG2331
715	Actinobacillus pleuropneumoniae	S8
715	Actinobacillus pleuropneumoniae	SC1516
715	Actinobacillus pleuropneumoniae	serotype 15 strain HS143
715	Actinobacillus pleuropneumoniae	serotype 5b strain L20
715	Actinobacillus pleuropneumoniae	Shope 4074
715	Actinobacillus pleuropneumoniae	SLW01
644	Aeromonas hydrophila	NJ-35
644	Aeromonas hydrophila	SSU
644	Aeromonas hydrophila	YJ-1
645	Aeromonas salmonicida	A449
645	Aeromonas salmonicida	JF2267
358	Agrobacterium tumefaciens	C58
358	Agrobacterium tumefaciens	NT1RE
373	Agrobacterium vitis	F2/5
5599	Alternaria alternata	15A
5599	Alternaria alternata	AC325
5599	Alternaria alternata	EGS 34-016	ATCC 66981, CBS 916.96, IMI 254138
5599	Alternaria alternata	EGS 37-132.2	ATCC 90610, Tottori 15A
5599	Alternaria alternata	EV-MIL31
5599	Alternaria alternata	HC-2S
5599	Alternaria alternata	HC1
5599	Alternaria alternata	M-71
5599	Alternaria alternata	NEW
5599	Alternaria alternata	SD-1
5599	Alternaria alternata	SH20
5599	Alternaria alternata	Z7
29001	Alternaria brassicicola	Abra43
29001	Alternaria brassicicola	abta14
29001	Alternaria brassicicola	ATCC 96866
29001	Alternaria brassicicola	EGS 42-002	ATCC 96836
29001	Alternaria brassicicola	Tf383
135859	Alternaria citri	OR1
160389	Alternaria longipes	C-00
48100	Alternaria solani	ALS1
48100	Alternaria solani	ALS2
5454	Ascochyta rabiei	AR628
40993	Aspergillus carbonarius	NRRL 368
5059	Aspergillus flavus	12
5059	Aspergillus flavus	CA14
5059	Aspergillus flavus	CA14 PTS
5059	Aspergillus flavus	NRRL 3357
5059	Aspergillus flavus	PTS
746128	Aspergillus fumigatus	237
746128	Aspergillus fumigatus	293.1
746128	Aspergillus fumigatus	5233
746128	Aspergillus fumigatus	A1160
746128	Aspergillus fumigatus	A1160C
746128	Aspergillus fumigatus	A1160P+
746128	Aspergillus fumigatus	A1161
746128	Aspergillus fumigatus	Af14
746128	Aspergillus fumigatus	Af293
746128	Aspergillus fumigatus	Af293.1
746128	Aspergillus fumigatus	AfS35
746128	Aspergillus fumigatus	AfS77
746128	Aspergillus fumigatus	akuBKU80
746128	Aspergillus fumigatus	B-5233
746128	Aspergillus fumigatus	CBS 144.89
746128	Aspergillus fumigatus	CEA10
746128	Aspergillus fumigatus	CEA17
746128	Aspergillus fumigatus	CEA17Δku80	CEA17deltaku80
746128	Aspergillus fumigatus	D141
746128	Aspergillus fumigatus	H237
746128	Aspergillus fumigatus	IF1SW-F4
746128	Aspergillus fumigatus	KU70
746128	Aspergillus fumigatus	KU80
746128	Aspergillus fumigatus	KU80ΔpyrG	KU80deltapyrG
746128	Aspergillus fumigatus	NCPF 2109	ATCC 46645
746128	Aspergillus fumigatus	NRC A-4-56
746128	Aspergillus fumigatus	YJ-407
162425	Aspergillus nidulans	A26
162425	Aspergillus nidulans	pabaA1
728	Avibacterium paragallinarum	TW07
728	Avibacterium paragallinarum	TW94
1392	Bacillus anthracis	ANR-1
1392	Bacillus anthracis	Sterne
1392	Bacillus anthracis	STI
1392	Bacillus anthracis	Vollum
1396	Bacillus cereus	0-9
1396	Bacillus cereus	ATCC 14579
1396	Bacillus cereus	F4810/72
1396	Bacillus cereus	G9241
1396	Bacillus cereus	HN001
176275	Beauveria bassiana	ANU1
176275	Beauveria bassiana	ARSEF 2575
176275	Beauveria bassiana	ARSEF 2860
176275	Beauveria bassiana	ARSEF 2861
176275	Beauveria bassiana	ATCC 90517	NRRL 20698
176275	Beauveria bassiana	Bb0062
176275	Beauveria bassiana	Bb2860
176275	Beauveria bassiana	BCC 2660
176275	Beauveria bassiana	GXsk1011
176275	Beauveria bassiana	JEF-007
5016	Bipolaris maydis	C4	ATCC 48331
5016	Bipolaris maydis	C5
5016	Bipolaris maydis	HITO7711
101162	Bipolaris oryzae	WK-1C
45130	Bipolaris sorokiniana	ND90Pr
40125	Bipolaris victoriae	HvW
5017	Bipolaris zeicola	164R10
5017	Bipolaris zeicola	367-1a
5017	Bipolaris zeicola	SB111
5039	Blastomyces dermatitidis	A
5039	Blastomyces dermatitidis	SCB-2
34373	Blumeria graminis	CC148
34373	Blumeria graminis	CH4.8
34373	Blumeria graminis	DH14
34373	Blumeria graminis	Fel09
34373	Blumeria graminis	isolate Bgt_JIW2
34373	Blumeria graminis	isolate K1
34373	Blumeria graminis	race A6
518	Bordetella bronchiseptica	D445
518	Bordetella bronchiseptica	KM22
518	Bordetella bronchiseptica	RB50
518	Bordetella bronchiseptica	S798
520	Bordetella pertussis	18323
520	Bordetella pertussis	B1917
520	Bordetella pertussis	BPSM
520	Bordetella pertussis	Tohama I
140	Borrelia hermsii	DAH
140	Borrelia hermsii	YOR
139	Borreliella burgdorferi	5A18NP1
139	Borreliella burgdorferi	B31
139	Borreliella burgdorferi	B31 5A18
139	Borreliella burgdorferi	B31 5A18 NP1
139	Borreliella burgdorferi	B31 5A4	B31-5A4
139	Borreliella burgdorferi	B31 A3
139	Borreliella burgdorferi	GCB920
139	Borreliella burgdorferi	ML23
40559	Botrytis cinerea	1750
40559	Botrytis cinerea	38B1	CGMCC 4006
40559	Botrytis cinerea	A-1-3
40559	Botrytis cinerea	A1
40559	Botrytis cinerea	B05.10
40559	Botrytis cinerea	BC22
40559	Botrytis cinerea	Bd90
40559	Botrytis cinerea	BY4741
40559	Botrytis cinerea	FJ1-3
40559	Botrytis cinerea	HYOGO11
40559	Botrytis cinerea	IK2018
40559	Botrytis cinerea	NY76
40559	Botrytis cinerea	SAS56
40559	Botrytis cinerea	T4
278938	Botrytis elliptica	Be9401
235	Brucella abortus	1119-3
235	Brucella abortus	2308
29459	Brucella melitensis	133
29459	Brucella melitensis	16M
29459	Brucella melitensis	2308
29459	Brucella melitensis	M28
29459	Brucella melitensis	NI
444163	Brucella microti	CCM4915
29461	Brucella suis	1330
95486	Burkholderia cenocepacia	H111
95486	Burkholderia cenocepacia	J2315
95486	Burkholderia cenocepacia	K56-2
292	Burkholderia cepacia	H111
488447	Burkholderia contaminans	IST408
337	Burkholderia glumae	106619
337	Burkholderia glumae	336gr-1
337	Burkholderia glumae	411gr-6
337	Burkholderia glumae	AU6208
337	Burkholderia glumae	BGR1
337	Burkholderia glumae	FU13
337	Burkholderia glumae	M3
337	Burkholderia glumae	Pg-10
337	Burkholderia glumae	Pg-15
337	Burkholderia glumae	Pg-7
337	Burkholderia glumae	PG1
337	Burkholderia glumae	SL2376
13373	Burkholderia mallei	ATCC 23344
28450	Burkholderia pseudomallei	1026b
28450	Burkholderia pseudomallei	10276
28450	Burkholderia pseudomallei	Bp82
28450	Burkholderia pseudomallei	DD503
28450	Burkholderia pseudomallei	E8
28450	Burkholderia pseudomallei	JW280
28450	Burkholderia pseudomallei	K96243
28450	Burkholderia pseudomallei	K96423
28450	Burkholderia pseudomallei	MSHR668
57975	Burkholderia thailandensis	ATCC 700388D-5
57975	Burkholderia thailandensis	E264
6326	Bursaphelenchus xylophilus	AMA3
6326	Bursaphelenchus xylophilus	AMA3cl
6326	Bursaphelenchus xylophilus	NXY61
6326	Bursaphelenchus xylophilus	YW4
197	Campylobacter jejuni	11-164
197	Campylobacter jejuni	11168
197	Campylobacter jejuni	81-176
197	Campylobacter jejuni	81116
197	Campylobacter jejuni	CS2
197	Campylobacter jejuni	F38011
197	Campylobacter jejuni	IA3902
197	Campylobacter jejuni	M1
197	Campylobacter jejuni	NCTC 11168
197	Campylobacter jejuni	NCTC 11168-O
197	Campylobacter jejuni	PopP2
5476	Candida albicans	10560-B
5476	Candida albicans	A72
5476	Candida albicans	BWP17
5476	Candida albicans	BWP17+cIP30
5476	Candida albicans	CAF-3
5476	Candida albicans	CAF2
5476	Candida albicans	CAF2-1
5476	Candida albicans	CAF3-1
5476	Candida albicans	CAI-4+CIp10
5476	Candida albicans	CAI-7
5476	Candida albicans	CAI4
5476	Candida albicans	CEC2908
5476	Candida albicans	CW542
5476	Candida albicans	DAY1
5476	Candida albicans	DAY185
5476	Candida albicans	DK318
5476	Candida albicans	DP42
5476	Candida albicans	GP1
5476	Candida albicans	HBCA 16
5476	Candida albicans	IOC 2023	2023, 582 (phase S), ATCC 10261, CBS 2718, CCY 29-3-108, FMJ 1011, IFO 1061
5476	Candida albicans	JC1936
5476	Candida albicans	JC747
5476	Candida albicans	KC645
5476	Candida albicans	M1477
5476	Candida albicans	R8
5476	Candida albicans	RM100
5476	Candida albicans	RM1000
5476	Candida albicans	SC5314
5476	Candida albicans	SGC2024
5476	Candida albicans	SGY243
5476	Candida albicans	SN148
5476	Candida albicans	SN152
5476	Candida albicans	SN250
5476	Candida albicans	SN425
5476	Candida albicans	SN76
5476	Candida albicans	W303a
5476	Candida albicans	YJA10
42374	Candida dubliniensis	Wü284
5478	Candida glabrata	311
5478	Candida glabrata	BG14
5478	Candida glabrata	BG2
5478	Candida glabrata	CBS 138
5478	Candida glabrata	HTL
5478	Candida glabrata	KUE100
5480	Candida parapsilosis	AM2001/0013
5480	Candida parapsilosis	BC014S
5480	Candida parapsilosis	CBS 604
5480	Candida parapsilosis	CDC317
5480	Candida parapsilosis	CLIB 214
5480	Candida parapsilosis	GA1
5482	Candida tropicalis	1909	ATCC 4563, ATCC 7349, ATCC 750, CBS 94, CCRC 20520, IFO 1070, IFO 1400, JCM 1541, NRRL Y-12699, NRRL Y-12968, NRRL Y-607
5482	Candida tropicalis	T1	ATCC MYA-3404
5158	Ceratocystis fimbriata	AF 100
312341	Ceratocystis harringtonii	119.78
84275	Cercospora kikuchii	PR
29003	Cercospora nicotianae	14
135779	Cercospora zeae-maydis	SCOH1-5
83560	Chlamydia muridarum	CMUT3
83560	Chlamydia muridarum	Nigg
83560	Chlamydia muridarum	Nigg3
813	Chlamydia trachomatis	25667R
813	Chlamydia trachomatis	A2497
813	Chlamydia trachomatis	D-LC
813	Chlamydia trachomatis	D/UW-3/CX
813	Chlamydia trachomatis	L2
67825	Citrobacter rodentium	DBS100
67825	Citrobacter rodentium	DBS770
67825	Citrobacter rodentium	GPM1831a
67825	Citrobacter rodentium	ICC168
67825	Citrobacter rodentium	ICC169
67825	Citrobacter rodentium	ICC180
28447	Clavibacter michiganensis	Cm15-2.0 sm
28447	Clavibacter michiganensis	NCPPB382
5111	Claviceps purpurea	20.1
5111	Claviceps purpurea	20.1Δku70	20.1deltaku70
5111	Claviceps purpurea	Cp20.1
5111	Claviceps purpurea	PI
36911	Clavispora lusitaniae	45090	ATCC 42720
1496	Clostridioides difficile	630
1496	Clostridioides difficile	630Δerm	630deltaerm
1496	Clostridioides difficile	JIR8094
1496	Clostridioides difficile	M7404
1496	Clostridioides difficile	R20291
1496	Clostridioides difficile	RT027
1502	Clostridium perfringens	26	A.J. Wilsdon type A, ATCC 3624, L.S. McClung 1997
1502	Clostridium perfringens	56
1502	Clostridium perfringens	CNEOP004
1502	Clostridium perfringens	CP1
1502	Clostridium perfringens	EHE-NE18
1502	Clostridium perfringens	JIR325
1502	Clostridium perfringens	NCTC 3110
1502	Clostridium perfringens	type D strain CN1020
5501	Coccidioides immitis	C735
199306	Coccidioides posadasii	C735
27357	Colletotrichum acutatum	Coll-153
27358	Colletotrichum coccodes	Si-60
27358	Colletotrichum coccodes	US-41
474922	Colletotrichum gloeosporioides	CFCC80308
474922	Colletotrichum gloeosporioides	Cg-14
474922	Colletotrichum gloeosporioides	EX2016-02
474922	Colletotrichum gloeosporioides	SMCG1#C
474922	Colletotrichum gloeosporioides	UQ62
474922	Colletotrichum gloeosporioides	W16
474922	Colletotrichum gloeosporioides	WT178
31870	Colletotrichum graminicola	CgM2
31870	Colletotrichum graminicola	M1.001
31870	Colletotrichum graminicola	M2
80884	Colletotrichum higginsianum	337-5
80884	Colletotrichum higginsianum	CH-1
80884	Colletotrichum higginsianum	Chku80
80884	Colletotrichum higginsianum	IMI349061	CH-1
5462	Colletotrichum lagenaria	104-T
5462	Colletotrichum lagenaria	9201Y
1585795	Colletotrichum lentis	CT-21
290576	Colletotrichum lindemuthianum	89 A2 2-3
290576	Colletotrichum lindemuthianum	N9.20
290576	Colletotrichum lindemuthianum	race beta
290576	Colletotrichum lindemuthianum	UPS9
5465	Colletotrichum orbiculare	104-T
5465	Colletotrichum orbiculare	MAFF240422
5466	Colletotrichum trifolii	race 1
1717	Corynebacterium diphtheriae	CDC-E8392
1717	Corynebacterium diphtheriae	HC04
1717	Corynebacterium diphtheriae	NCTC 13129
65058	Corynebacterium ulcerans	809
777	Coxiella burnetii	Nine Mile Phase I
777	Coxiella burnetii	Nine Mile phase II
777	Coxiella burnetii	Nine Mile phase II clone 4
777	Coxiella burnetii	RSA 439
777	Coxiella burnetii	Tn1832
413502	Cronobacter turicensis	LMG 23827
535744	Cronobacter universalis	LMG 26249
5116	Cryphonectria parasitica	EP155
5116	Cryphonectria parasitica	EP155/2
5116	Cryphonectria parasitica	Δcpku80	deltacpku80
552467	Cryptococcus gattii VGIII	NIH 444
552467	Cryptococcus gattii VGIII	R265
5207	Cryptococcus neoformans	B-3501
5207	Cryptococcus neoformans	B-4476
5207	Cryptococcus neoformans	B-4500
5207	Cryptococcus neoformans	B4131
5207	Cryptococcus neoformans	cap10F2FO
5207	Cryptococcus neoformans	CM018
5207	Cryptococcus neoformans	CNU125
5207	Cryptococcus neoformans	E2
5207	Cryptococcus neoformans	H99
5207	Cryptococcus neoformans	H99FOA19
5207	Cryptococcus neoformans	JEC21
5207	Cryptococcus neoformans	JEC33
5207	Cryptococcus neoformans	JEC43
5207	Cryptococcus neoformans	KN99
5207	Cryptococcus neoformans	KN99α	KN99alpha
5207	Cryptococcus neoformans	M001
5207	Cryptococcus neoformans	MATa KN99
5207	Cryptococcus neoformans	RC2
5207	Cryptococcus neoformans	serotype A strain B-4551
5207	Cryptococcus neoformans	serotype A strain H99
5207	Cryptococcus neoformans	serotype A strain KN99
5207	Cryptococcus neoformans	serotype A strain M049
5207	Cryptococcus neoformans	serotype D strain ATCC 208819
5207	Cryptococcus neoformans	serotype D strain B4500
5207	Cryptococcus neoformans	serotype D strain JEC155
5207	Cryptococcus neoformans	serotype D strain JEC20
5207	Cryptococcus neoformans	serotype D strain JEC21
5207	Cryptococcus neoformans	serotype D strain JEC43
5207	Cryptococcus neoformans	serotype D strain LP2
5207	Cryptococcus neoformans	serotype D strain LP8
5207	Cryptococcus neoformans	serotype D strain NE167-170
5207	Cryptococcus neoformans	WSA-7
5207	Cryptococcus neoformans	XL280
5503	Curvularia lunata	CX-3
43	Cystobacter fuscus	DSMZ2262
430498	Dactylellina haptotyla	CBS 200.50
204038	Dickeya dadantii	3937
204038	Dickeya dadantii	EC3937
1089444	Dickeya solani	IFB0099
1089444	Dickeya solani	IFB0123
1089444	Dickeya solani	IFB0158
1089444	Dickeya solani	IFB0221
1089444	Dickeya solani	IFB0223
1089444	Dickeya solani	IPO 2222
67780	Edwardsiella ictaluri	93-146
67780	Edwardsiella ictaluri	HSN-1
636	Edwardsiella tarda	EIB202
636	Edwardsiella tarda	ET13
636	Edwardsiella tarda	H1
636	Edwardsiella tarda	PPD130/91
636	Edwardsiella tarda	TX01
1351	Enterococcus faecalis	12030
1351	Enterococcus faecalis	E99
1351	Enterococcus faecalis	EryS
1351	Enterococcus faecalis	JH2-2
1351	Enterococcus faecalis	MMH594
1351	Enterococcus faecalis	OG1RF
1351	Enterococcus faecalis	S613
1351	Enterococcus faecalis	Symbioflor 1
1351	Enterococcus faecalis	V583
1352	Enterococcus faecium	DO
1352	Enterococcus faecium	TX82
1352	Enterococcus faecium	U0317
35717	Epichloe festucae	E2368
35717	Epichloe festucae	Fl1
552	Erwinia amylovora	1189
552	Erwinia amylovora	CFBP 1430
552	Erwinia amylovora	Ea1189
552	Erwinia amylovora	Ea321
552	Erwinia amylovora	HKN06P1
552	Erwinia amylovora	NCPPB 1665
562	Escherichia coli	042
562	Escherichia coli	12-05829
562	Escherichia coli	392 ISS
562	Escherichia coli	536
562	Escherichia coli	86-24
562	Escherichia coli	A1749
562	Escherichia coli	A192PP
562	Escherichia coli	AE17
562	Escherichia coli	AE81
562	Escherichia coli	APCE94
562	Escherichia coli	APEC DE205B
562	Escherichia coli	APEC O1
562	Escherichia coli	APEC serotype O83:H4 ST117
562	Escherichia coli	APEC strain SCI-07
562	Escherichia coli	APEC-34 O91
562	Escherichia coli	APEC94
562	Escherichia coli	BA320
562	Escherichia coli	BW25113
562	Escherichia coli	C227-11
562	Escherichia coli	C83902
562	Escherichia coli	CE129
562	Escherichia coli	CFT073
562	Escherichia coli	CH2
562	Escherichia coli	CP9
562	Escherichia coli	DE17
562	Escherichia coli	DE205B
562	Escherichia coli	DE719
562	Escherichia coli	E058
562	Escherichia coli	E2348/69
562	Escherichia coli	E44
562	Escherichia coli	EAEC 042
562	Escherichia coli	EAEC CV323/77
562	Escherichia coli	ECB480
562	Escherichia coli	EDL933
562	Escherichia coli	EPEC E2348/69
562	Escherichia coli	F11
562	Escherichia coli	F149H1S2
562	Escherichia coli	FY26
562	Escherichia coli	H10407
562	Escherichia coli	J53
562	Escherichia coli	J96
562	Escherichia coli	JM103
562	Escherichia coli	K1 ZD1
562	Escherichia coli	KP7600
562	Escherichia coli	LF82
562	Escherichia coli	LRT9
562	Escherichia coli	M12
562	Escherichia coli	MS7163
562	Escherichia coli	MT78
562	Escherichia coli	Nissle 1917
562	Escherichia coli	PA45B
562	Escherichia coli	PCN033
562	Escherichia coli	PPECC42
562	Escherichia coli	QCT598
562	Escherichia coli	RS218
562	Escherichia coli	SEPT362
562	Escherichia coli	serotype O127:H6 strain E2348/69
562	Escherichia coli	serotype O157	EHEC O157:H7
562	Escherichia coli	serotype O157:H7
562	Escherichia coli	serotype O157:H7 strain 620
562	Escherichia coli	serotype O157:H7 strain 86-24
562	Escherichia coli	serotype O157:H7 strain EDL932
562	Escherichia coli	serotype O157:H7 strain EDL933
562	Escherichia coli	serotype O2 strain DE17
562	Escherichia coli	serotype O2:K1 strain DE719
562	Escherichia coli	serotype O2:K1:H7 strain M78
562	Escherichia coli	serotype O32:H37 strain P4
562	Escherichia coli	serotype O78:H9
562	Escherichia coli	serotype O78:K80:H9 strain χ7122	serotype O78:K80:H9 strain chi7122
562	Escherichia coli	serotype O91:H21 strain B2F1
562	Escherichia coli	SP15
562	Escherichia coli	TW-XM
562	Escherichia coli	TW08571
562	Escherichia coli	TW14359
562	Escherichia coli	U8
562	Escherichia coli	UCB34
562	Escherichia coli	UTI89
562	Escherichia coli	XM
5970	Exophiala dermatitidis	8656
5970	Exophiala dermatitidis	CBS 525.76
5970	Exophiala dermatitidis	Wd8656
93612	Exserohilum turcicum	Et28A
96345	Flavobacterium psychrophilum	FKR9801
96345	Flavobacterium psychrophilum	NCIMB1947
96345	Flavobacterium psychrophilum	OSU THCO2-90
263	Francisella tularensis	FSC200
263	Francisella tularensis	LVS	ATCC 29684
263	Francisella tularensis	SCHU P0
263	Francisella tularensis	SCHU S4
263	Francisella tularensis	U112
282267	Fusarium asiaticum	2021
282267	Fusarium asiaticum	EXAP-08
282267	Fusarium asiaticum	FaJT041
282267	Fusarium asiaticum	GJ33
282267	Fusarium asiaticum	zj-1
5516	Fusarium culmorum	IBT8336
5516	Fusarium culmorum	UK99
5127	Fusarium fujikuroi	109-R-7
5127	Fusarium fujikuroi	7600
5127	Fusarium fujikuroi	IMI58289
5127	Fusarium fujikuroi	M-3125
5518	Fusarium graminearum	1104-14
5518	Fusarium graminearum	16A
5518	Fusarium graminearum	2021
5518	Fusarium graminearum	3827
5518	Fusarium graminearum	5035
5518	Fusarium graminearum	54606
5518	Fusarium graminearum	8/1
5518	Fusarium graminearum	8/151
5518	Fusarium graminearum	CS3005
5518	Fusarium graminearum	DAOM 180378
5518	Fusarium graminearum	DAOM 233423
5518	Fusarium graminearum	Fg 8/1
5518	Fusarium graminearum	Fg 820
5518	Fusarium graminearum	FSK511
5518	Fusarium graminearum	GZ03643
5518	Fusarium graminearum	GZ3639
5518	Fusarium graminearum	HN9-1
5518	Fusarium graminearum	INRA 605
5518	Fusarium graminearum	NRRL 13383
5518	Fusarium graminearum	NRRL 46422
5518	Fusarium graminearum	PH-1
5518	Fusarium graminearum	R5317
5518	Fusarium graminearum	SCK04
5518	Fusarium graminearum	SF01-3
5518	Fusarium graminearum	Y2021A
5518	Fusarium graminearum	Z-3639
5518	Fusarium graminearum	Z-3643
5518	Fusarium graminearum	Z03639
5518	Fusarium graminearum	Z03643
5518	Fusarium graminearum	Z3936
5507	Fusarium oxysporum	007
5507	Fusarium oxysporum	26406
5507	Fusarium oxysporum	297
5507	Fusarium oxysporum	4287
5507	Fusarium oxysporum	4288
5507	Fusarium oxysporum	CGMCC3.2830
5507	Fusarium oxysporum	Chiba-5
5507	Fusarium oxysporum	CK3-1
5507	Fusarium oxysporum	F9
5507	Fusarium oxysporum	FGSC 10442
5507	Fusarium oxysporum	Fo5176
5507	Fusarium oxysporum	FocGD
5507	Fusarium oxysporum	Fol007
5507	Fusarium oxysporum	FOP-SP1
5507	Fusarium oxysporum	FOP-SP2
5507	Fusarium oxysporum	Foxy20
5507	Fusarium oxysporum	H1-ChFP
5507	Fusarium oxysporum	O-685
5507	Fusarium oxysporum	race 1
5507	Fusarium oxysporum	race 2
5507	Fusarium oxysporum	race 2 strain 42-87
5507	Fusarium oxysporum	race 2 strain 4287	FGSC 9935, FOL 4287, NRRL 34936
5507	Fusarium oxysporum	race 2 strain Fol007
5507	Fusarium oxysporum	race 2 strain Mel02010
5507	Fusarium oxysporum	race 4
5507	Fusarium oxysporum	race 4 strain XJZ2
5507	Fusarium oxysporum	TR4
5507	Fusarium oxysporum	TR4 strain II5	NRRL 54006, Tropical Race 4 strain II5
948311	Fusarium proliferatum	FP9
101028	Fusarium pseudograminearum	CS11286
101028	Fusarium pseudograminearum	CS3096
101028	Fusarium pseudograminearum	CS3427
101028	Fusarium pseudograminearum	CS5519
101028	Fusarium pseudograminearum	IBT 1544
101028	Fusarium pseudograminearum	WZ-8A
101028	Fusarium pseudograminearum	WZ2-8
101028	Fusarium pseudograminearum	WZ2-8A
5128	Fusarium sambucinum	R6380
169388	Fusarium solani	114
169388	Fusarium solani	230-30-6
169388	Fusarium solani	77-13-7
169388	Fusarium solani	94-6-1
169388	Fusarium solani	PGB153
169388	Fusarium solani	T8
5514	Fusarium sporotrichioides	NRRL 3299
117187	Fusarium verticillioides	5611
117187	Fusarium verticillioides	7598
117187	Fusarium verticillioides	7600
117187	Fusarium verticillioides	A00999
117187	Fusarium verticillioides	ITEM 10027
117187	Fusarium verticillioides	M-3120
117187	Fusarium verticillioides	M-3125
232082	Fusarium virguliforme	Mont-1
29850	Gaeumannomyces graminis	A3
29850	Gaeumannomyces graminis	LY3-21
738	Glaesserella parasuis	HS49
738	Glaesserella parasuis	LC
738	Glaesserella parasuis	SC096
738	Glaesserella parasuis	SC1401
36090	Globodera pallida	Pa 2/3
31243	Globodera rostochiensis	Ro1-Mierenbos
226899	Grosmannia clavigera	kw1407
730	Haemophilus ducreyi	35000HP
727	Haemophilus influenzae	2866
727	Haemophilus influenzae	375
727	Haemophilus influenzae	86-028NP
727	Haemophilus influenzae	NTHI 2019
727	Haemophilus influenzae	NTHi 375
727	Haemophilus influenzae	PittII
210	Helicobacter pylori	10A
210	Helicobacter pylori	17875/Leb23
210	Helicobacter pylori	26695
210	Helicobacter pylori	51B
210	Helicobacter pylori	64
210	Helicobacter pylori	7.13
210	Helicobacter pylori	AB31
210	Helicobacter pylori	AB5
210	Helicobacter pylori	ATCC 43504	JCM 7653, NCTC 11637, RPH 13487
210	Helicobacter pylori	B128
210	Helicobacter pylori	B128-S
210	Helicobacter pylori	G27
210	Helicobacter pylori	N6
210	Helicobacter pylori	PMSS1
210	Helicobacter pylori	SS1
210	Helicobacter pylori	X47
210	Helicobacter pylori	X47-2AL
13563	Heterobasidion annosum	3012
5037	Histoplasma capsulatum	G184AS
5037	Histoplasma capsulatum	G186A
5037	Histoplasma capsulatum	G186AR ura5
5037	Histoplasma capsulatum	G217B
5037	Histoplasma capsulatum	G217B ura5
5037	Histoplasma capsulatum	G217B ura5Δ	G217B ura5delta
5037	Histoplasma capsulatum	UC26
272952	Hyaloperonospora arabidopsidis	Cala2
272952	Hyaloperonospora arabidopsidis	Emco5
272952	Hyaloperonospora arabidopsidis	Emoy2
272952	Hyaloperonospora arabidopsidis	Emwa1
272952	Hyaloperonospora arabidopsidis	Maks9
272952	Hyaloperonospora arabidopsidis	Noco2
272952	Hyaloperonospora arabidopsidis	Noks1
272952	Hyaloperonospora arabidopsidis	Waco9
504	Kingella kingae	KK003
504	Kingella kingae	PYKK081
573	Klebsiella pneumoniae	123/01
573	Klebsiella pneumoniae	52.145
573	Klebsiella pneumoniae	ATCC 43816
573	Klebsiella pneumoniae	CDC 298/53	ATCC 13883, CDCD 298/53, DSM 30104, IAM 14200, JCM 1662, NCTC 9633, WDCM 00097
573	Klebsiella pneumoniae	CG43
573	Klebsiella pneumoniae	hvKP1
573	Klebsiella pneumoniae	K2044
573	Klebsiella pneumoniae	KL1
573	Klebsiella pneumoniae	KL47
573	Klebsiella pneumoniae	Kp52.145
573	Klebsiella pneumoniae	KPPR1
573	Klebsiella pneumoniae	KPPR1S
573	Klebsiella pneumoniae	LM21
573	Klebsiella pneumoniae	MKP103
573	Klebsiella pneumoniae	NTUH-2044
573	Klebsiella pneumoniae	NTUH-K2044
573	Klebsiella pneumoniae	ST86
573	Klebsiella pneumoniae	TOP52
573	Klebsiella pneumoniae	UKP8
1358	Lactococcus lactis	MG1363
93591	Lecanicillium fungicola	150-1
446	Legionella pneumophila	130b
446	Legionella pneumophila	AA100/130b
446	Legionella pneumophila	Corby
446	Legionella pneumophila	CR39
446	Legionella pneumophila	JR32
446	Legionella pneumophila	Lp01
446	Legionella pneumophila	Lp02
446	Legionella pneumophila	Lp02pj
446	Legionella pneumophila	Paris
446	Legionella pneumophila	Philadelphia-1 Lp02
5671	Leishmania infantum	JPCM5
5664	Leishmania major	CC1
5664	Leishmania major	lv39
5664	Leishmania major	MHOM/IL/80/Friedlin
5664	Leishmania major	MHOM/IL/81/Friedlin
5664	Leishmania major	MHOM/JL/80/Friedlin
5664	Leishmania major	MHOM/SU/73/5-ASKH
5664	Leishmania major	WHOM/IR/-/173
5665	Leishmania mexicana	M379
5665	Leishmania mexicana	MNYC/BZ/62/M379
5022	Leptosphaeria maculans	00-100
5022	Leptosphaeria maculans	D5
5022	Leptosphaeria maculans	DS103
5022	Leptosphaeria maculans	IBCN 14
5022	Leptosphaeria maculans	ICBN 18
5022	Leptosphaeria maculans	JN3
5022	Leptosphaeria maculans	M1
5022	Leptosphaeria maculans	Nzt-4
5022	Leptosphaeria maculans	v23.1.3
5022	Leptosphaeria maculans	v23.1.3 × v37.1.4	v23.1.3 x v37.1.4
173	Leptospira interrogans	702
173	Leptospira interrogans	Lai
173	Leptospira interrogans	serovar Copenhageni strain M20
173	Leptospira interrogans	serovar Lai strain LR31
173	Leptospira interrogans	serovar Manilae strain L495
1639	Listeria monocytogenes	10403S
1639	Listeria monocytogenes	BUG 1600
1639	Listeria monocytogenes	BUG 1777
1639	Listeria monocytogenes	EGD
1639	Listeria monocytogenes	EGD-e
1639	Listeria monocytogenes	F2365
1639	Listeria monocytogenes	F6214-1
1639	Listeria monocytogenes	LM430
1639	Listeria monocytogenes	LM440
1639	Listeria monocytogenes	LM470
1639	Listeria monocytogenes	LO28
1639	Listeria monocytogenes	M7
1639	Listeria monocytogenes	NTSN
1639	Listeria monocytogenes	QOC1
1639	Listeria monocytogenes	serotype 1/2a strain EGD-e
1639	Listeria monocytogenes	serotype 1/2b strain 2011L-2858
1639	Listeria monocytogenes	SHL006
1639	Listeria monocytogenes	SHL12-2
1639	Listeria monocytogenes	SHL12-22
1639	Listeria monocytogenes	SHL13-12
71657	Lonsdalea quercina	N-5-1
318829	Magnaporthe oryzae	2539
318829	Magnaporthe oryzae	3986-R45
318829	Magnaporthe oryzae	4091-5-8
318829	Magnaporthe oryzae	4360-R-62
318829	Magnaporthe oryzae	4392-1-6
318829	Magnaporthe oryzae	70-15
318829	Magnaporthe oryzae	84R-62B
318829	Magnaporthe oryzae	85-14B1
318829	Magnaporthe oryzae	9041-5-8
318829	Magnaporthe oryzae	95234I-1b
318829	Magnaporthe oryzae	98-06
318829	Magnaporthe oryzae	A1343R-7
318829	Magnaporthe oryzae	B157
318829	Magnaporthe oryzae	Br48
318829	Magnaporthe oryzae	CP987
318829	Magnaporthe oryzae	Guy11	Guy-11
318829	Magnaporthe oryzae	Guy11 Δku70	Guy-11 Δku70, Guy11 deltaku70
318829	Magnaporthe oryzae	H3:eGFP
318829	Magnaporthe oryzae	Hoku-1
318829	Magnaporthe oryzae	Ina168
318829	Magnaporthe oryzae	Ina72
318829	Magnaporthe oryzae	Ina86-137
318829	Magnaporthe oryzae	JL0910
318829	Magnaporthe oryzae	JS153
318829	Magnaporthe oryzae	Ken53-33
318829	Magnaporthe oryzae	Ken54-20
318829	Magnaporthe oryzae	Kita 1
318829	Magnaporthe oryzae	KJ201
318829	Magnaporthe oryzae	KJ301
318829	Magnaporthe oryzae	ku80
318829	Magnaporthe oryzae	KV1
318829	Magnaporthe oryzae	KV103
318829	Magnaporthe oryzae	LY-130
318829	Magnaporthe oryzae	LY-130-R1
318829	Magnaporthe oryzae	LY-130-R4
318829	Magnaporthe oryzae	O-137
318829	Magnaporthe oryzae	OS99-G-7a
318829	Magnaporthe oryzae	P-2b
318829	Magnaporthe oryzae	P1.2
318829	Magnaporthe oryzae	P131
318829	Magnaporthe oryzae	P2
318829	Magnaporthe oryzae	PWL2
318829	Magnaporthe oryzae	Q-10
318829	Magnaporthe oryzae	Q-10C
318829	Magnaporthe oryzae	Q-10C3
318829	Magnaporthe oryzae	Q-11
318829	Magnaporthe oryzae	Q-3
318829	Magnaporthe oryzae	Q-8
318829	Magnaporthe oryzae	R88-002
318829	Magnaporthe oryzae	race 031 strain Ina72
318829	Magnaporthe oryzae	RB22
318829	Magnaporthe oryzae	RO1-1
318829	Magnaporthe oryzae	Sasa2
318829	Magnaporthe oryzae	TH68-141
318829	Magnaporthe oryzae	Y-34
318829	Magnaporthe oryzae	Y34
318829	Magnaporthe oryzae	YN125
203908	Melampsora larici-populina	98AG31
6303	Meloidogyne javanica	VW4
92637	Metarhizium acridum	CQMa 102
5530	Metarhizium anisopliae	BCRC30501
5530	Metarhizium anisopliae	CG 148
5530	Metarhizium anisopliae	E6
5530	Metarhizium anisopliae	SM04
568076	Metarhizium robertsii	ARSEF 23
568076	Metarhizium robertsii	ARSEF 2575
1682391	Microdochium sorghi	T-442
38448	Monilinia fructicola	Bmpc7
38448	Monilinia fructicola	MS9
38448	Monilinia fructicola	MUK-1
153609	Moniliophthora perniciosa	CP02
552546	Muricauda olearia	Th120
1764	Mycobacterium avium	104	MAC104, MAH 104
1764	Mycobacterium avium	au2
1781	Mycobacterium marinum	E11
1781	Mycobacterium marinum	M
1781	Mycobacterium marinum	M USA	M<USA>, MUSA
1773	Mycobacterium tuberculosis	AF2122/97
1773	Mycobacterium tuberculosis	BCG
1773	Mycobacterium tuberculosis	CDC 1551
1773	Mycobacterium tuberculosis	Erdman
1773	Mycobacterium tuberculosis	H37Ra
1773	Mycobacterium tuberculosis	H37Rv
1773	Mycobacterium tuberculosis	ML617
1773	Mycobacterium tuberculosis	Mt103
36809	Mycobacteroides abscessus	19977-IP
36809	Mycobacteroides abscessus	CIP 104536
36809	Mycobacteroides abscessus	CIP 104536T
36809	Mycobacteroides abscessus	CIP 108541
1774	Mycobacteroides chelonae	CCUG 47445
1772	Mycolicibacterium smegmatis	MC2 155
2110	Mycoplasma agalactiae	PG2
28903	Mycoplasma bovis	HB0801
2096	Mycoplasma gallisepticum	Ap3AS
2096	Mycoplasma gallisepticum	R
13164	Myzus persicae	RRes (genotype O)
485	Neisseria gonorrhoeae	FA 1090
487	Neisseria meningitidis	93/4286
487	Neisseria meningitidis	FAM20
487	Neisseria meningitidis	MC58
487	Neisseria meningitidis	NIID84 Δcps	NIID84 deltacps
487	Neisseria meningitidis	Norman B:14:P1.7,16
2813651	Orbilia oligospora	ATCC 24927	CBS 115.81, DSM 1491
2813651	Orbilia oligospora	CBS 115.81
2813651	Orbilia oligospora	YMF 1.3170
1464	Paenibacillus larvae	846	ATCC 9545, NRRL B-2605
1464	Paenibacillus larvae	DSM 25430
553	Pantoea ananatis	LMG 20103
553	Pantoea ananatis	LMG 2665
553	Pantoea ananatis	OC5a Rpr
66269	Pantoea stewartii	DC283
66269	Pantoea stewartii	SS104
121759	Paracoccidioides brasiliensis	18
121759	Paracoccidioides brasiliensis	GR 8898	ATCC 60855
121759	Paracoccidioides brasiliensis	Pb18
121759	Paracoccidioides brasiliensis	Pb339
13684	Parastagonospora nodorum	BS171
13684	Parastagonospora nodorum	LAW95
13684	Parastagonospora nodorum	Sch1-30
13684	Parastagonospora nodorum	SN15
13684	Parastagonospora nodorum	Sn1501
13684	Parastagonospora nodorum	Sn2000
5499	Passalora fulva	race 0
5499	Passalora fulva	race 0WU
5499	Passalora fulva	race 2
5499	Passalora fulva	race 4
5499	Passalora fulva	race 5
5499	Passalora fulva	race 9
29471	Pectobacterium atrosepticum	SCRI 1043
29471	Pectobacterium atrosepticum	SCRI1039
180957	Pectobacterium brasiliense	BF45
554	Pectobacterium carotovorum	1692
554	Pectobacterium carotovorum	Ecc71
554	Pectobacterium carotovorum	KD100
554	Pectobacterium carotovorum	Pcc21
554	Pectobacterium carotovorum	PccS1
554	Pectobacterium carotovorum	WPP14
55208	Pectobacterium wasabiae	SCC3193
36651	Penicillium digitatum	HS-F6
36651	Penicillium digitatum	isolate PHI26 strain CECT20796
36651	Penicillium digitatum	Pd01
36651	Penicillium digitatum	Pd1
36651	Penicillium digitatum	Pd149
36651	Penicillium digitatum	Pd27
36651	Penicillium digitatum	PdKH8
36651	Penicillium digitatum	PdW03
36651	Penicillium digitatum	PHI26
27334	Penicillium expansum	CMP-1
27334	Penicillium expansum	MD-8
27334	Penicillium expansum	NRRL 35695
27334	Penicillium expansum	Pe-21
27334	Penicillium expansum	Pe-T01
27334	Penicillium expansum	PE100/PEX2
27334	Penicillium expansum	PEX1
27334	Penicillium expansum	PEX2
27334	Penicillium expansum	T01
27334	Penicillium expansum	TJT1.1
38293	Photobacterium damselae	DI21
29488	Photorhabdus luminescens	158-S-2
29920	Phytophthora cactorum	10300
29920	Phytophthora cactorum	P381
4784	Phytophthora capsici	BYA5
4784	Phytophthora capsici	LT1534
4784	Phytophthora capsici	LT263
4784	Phytophthora capsici	LT6535
4784	Phytophthora capsici	Pc537
4784	Phytophthora capsici	SD33
4787	Phytophthora infestans	14-3-GFP
4787	Phytophthora infestans	90128
4787	Phytophthora infestans	F80029
4787	Phytophthora infestans	HP10-45
4787	Phytophthora infestans	METV-618
4787	Phytophthora infestans	MX5-1
4787	Phytophthora infestans	NL-88069
4787	Phytophthora infestans	T30-4
4792	Phytophthora parasitica	1828
4792	Phytophthora parasitica	310	INRA-310
4792	Phytophthora parasitica	98151
4792	Phytophthora parasitica	IAC_01/95.1
4792	Phytophthora parasitica	race 0
67593	Phytophthora sojae	P6954
67593	Phytophthora sojae	P7076
67593	Phytophthora sojae	race 2 strain P6497
67593	Phytophthora sojae	race 7 strain P7064
5821	Plasmodium berghei	ANKA
5821	Plasmodium berghei	NK65
5833	Plasmodium falciparum	3D7
5833	Plasmodium falciparum	ANKA
5833	Plasmodium falciparum	CS2
837	Porphyromonas gingivalis	2561	ATCC 33277
837	Porphyromonas gingivalis	A7436
837	Porphyromonas gingivalis	W83
584	Proteus mirabilis	HI4320
584	Proteus mirabilis	N2
1873960	Pseudocercospora fijiensis	10CR1-24
1873960	Pseudocercospora fijiensis	CIRAD86
287	Pseudomonas aeruginosa	1244
287	Pseudomonas aeruginosa	AES-1M
287	Pseudomonas aeruginosa	FRD1
287	Pseudomonas aeruginosa	H103
287	Pseudomonas aeruginosa	IHMA879472
287	Pseudomonas aeruginosa	LESB58
287	Pseudomonas aeruginosa	MPAO1
287	Pseudomonas aeruginosa	PA1
287	Pseudomonas aeruginosa	PA103
287	Pseudomonas aeruginosa	PA14
287	Pseudomonas aeruginosa	PA4
287	Pseudomonas aeruginosa	PAK
287	Pseudomonas aeruginosa	PAO1
287	Pseudomonas aeruginosa	PAO1-L
287	Pseudomonas aeruginosa	PAO1-UW
287	Pseudomonas aeruginosa	PAO1001
287	Pseudomonas aeruginosa	PAO1161
287	Pseudomonas aeruginosa	S470
287	Pseudomonas aeruginosa	SCH0057-7
287	Pseudomonas aeruginosa	UCBPP-PA14
86840	Pseudomonas cannabina	KB211
36746	Pseudomonas cichorii	198	ATCC 10857
36746	Pseudomonas cichorii	JBC1
36746	Pseudomonas cichorii	SF1-54
294	Pseudomonas fluorescens	FD6
294	Pseudomonas fluorescens	TSS
50340	Pseudomonas fuscovaginae	DAR77795
50340	Pseudomonas fuscovaginae	DAR77800
50340	Pseudomonas fuscovaginae	UPB0736
29438	Pseudomonas savastanoi	DAPP-PG 722
29438	Pseudomonas savastanoi	NCPPB 3335
29438	Pseudomonas savastanoi	Psn23
317	Pseudomonas syringae	1302A
317	Pseudomonas syringae	1448A
317	Pseudomonas syringae	151
317	Pseudomonas syringae	61
317	Pseudomonas syringae	6605
317	Pseudomonas syringae	7B40
317	Pseudomonas syringae	870A
317	Pseudomonas syringae	A2
317	Pseudomonas syringae	B728a
317	Pseudomonas syringae	biovar 3 strain ICMP 18884
317	Pseudomonas syringae	BRIP34876
317	Pseudomonas syringae	CFCC 1336
317	Pseudomonas syringae	DC3000
317	Pseudomonas syringae	DC3000 D36E
317	Pseudomonas syringae	ES4326
317	Pseudomonas syringae	HL1
317	Pseudomonas syringae	JL1065
317	Pseudomonas syringae	M2
317	Pseudomonas syringae	M228
317	Pseudomonas syringae	M301315
317	Pseudomonas syringae	M6
317	Pseudomonas syringae	MB03
317	Pseudomonas syringae	NPS3121
317	Pseudomonas syringae	PT23
317	Pseudomonas syringae	R1-5244
317	Pseudomonas syringae	race 1
317	Pseudomonas syringae	race 3
317	Pseudomonas syringae	race 4
317	Pseudomonas syringae	race 4 strain 1302A
317	Pseudomonas syringae	race 6
317	Pseudomonas syringae	race 6 strain 1448A
317	Pseudomonas syringae	race 7 strain 1449B
29442	Pseudomonas tolaasii	6264
285811	Pseudopyrenochaeta lycopersici	ISPaVe ER 1211
5297	Puccinia graminis	CRL 75-36-700-3
27350	Puccinia striiformis	CYR31
27350	Puccinia striiformis	CYR32
53485	Pyrenophora teres	15A
45151	Pyrenophora tritici-repentis	Alg3-24
45151	Pyrenophora tritici-repentis	race 4 strain B16
45151	Pyrenophora tritici-repentis	race 4 strain B17
45151	Pyrenophora tritici-repentis	race 5
45151	Pyrenophora tritici-repentis	SD-20
329	Ralstonia pickettii	WP1
305	Ralstonia solanacearum	BK1002
305	Ralstonia solanacearum	GMI1000
305	Ralstonia solanacearum	K60
305	Ralstonia solanacearum	OE1-1
305	Ralstonia solanacearum	Rs-09-161
305	Ralstonia solanacearum	RS1000
305	Ralstonia solanacearum	RS1002
305	Ralstonia solanacearum	SL2029
305	Ralstonia solanacearum	SL341
305	Ralstonia solanacearum	UW551
305	Ralstonia solanacearum	UY031
305	Ralstonia solanacearum	ZJ3721
64495	Rhizopus oryzae	99-880
914237	Rhynchosporium commune	1130
914237	Rhynchosporium commune	UK7
34085	Riemerella anatipestifer	RA-CH-1
34085	Riemerella anatipestifer	serotype 1 strain CH3
34085	Riemerella anatipestifer	Yb2
34085	Riemerella anatipestifer	YZb1
77044	Rosellinia necatrix	W97
4932	Saccharomyces cerevisiae	BY4741
4932	Saccharomyces cerevisiae	NCPF8313
4932	Saccharomyces cerevisiae	S288c
28901	Salmonella enterica	119944
28901	Salmonella enterica	12023
28901	Salmonella enterica	13076
28901	Salmonella enterica	2229
28901	Salmonella enterica	287/91
28901	Salmonella enterica	3588/07
28901	Salmonella enterica	50336
28901	Salmonella enterica	90-13-706
28901	Salmonella enterica	Ag 1
28901	Salmonella enterica	ATCC 13312	NCTC 5735
28901	Salmonella enterica	ATCC 14028s
28901	Salmonella enterica	ATCC 14029	Bader M51, CDC 3085-55, NCIB 9242, NCTC 10360, RH 798
28901	Salmonella enterica	BRD509
28901	Salmonella enterica	C5
28901	Salmonella enterica	C50041
28901	Salmonella enterica	C79-13
28901	Salmonella enterica	CA4787
28901	Salmonella enterica	CDC 6516-60	ATCC 14028
28901	Salmonella enterica	CDC_2010K_0968
28901	Salmonella enterica	CT_02021853
28901	Salmonella enterica	CVCC3378
28901	Salmonella enterica	E-2375
28901	Salmonella enterica	E2627
28901	Salmonella enterica	G9
28901	Salmonella enterica	GIFU10007
28901	Salmonella enterica	HA420
28901	Salmonella enterica	HA431
28901	Salmonella enterica	IR715
28901	Salmonella enterica	J91
28901	Salmonella enterica	JSG210
28901	Salmonella enterica	LA5
28901	Salmonella enterica	Lane
28901	Salmonella enterica	LT2
28901	Salmonella enterica	MvP771
28901	Salmonella enterica	NCTC S12023
28901	Salmonella enterica	P125109
28901	Salmonella enterica	PT4
28901	Salmonella enterica	S06004
28901	Salmonella enterica	S6702
28901	Salmonella enterica	SAT52
28901	Salmonella enterica	SB300
28901	Salmonella enterica	SD3246
28901	Salmonella enterica	SE211
28901	Salmonella enterica	SL1344
28901	Salmonella enterica	SM6
28901	Salmonella enterica	ST313
28901	Salmonella enterica	ST4/74
28901	Salmonella enterica	STH2370
28901	Salmonella enterica	SV5015
28901	Salmonella enterica	Ty2
28901	Salmonella enterica	UK-1	UK1
28901	Salmonella enterica	UK1	UK-1
28901	Salmonella enterica	UMR1
28901	Salmonella enterica	X3306
28901	Salmonella enterica	X4232
5180	Sclerotinia sclerotiorum	1980
5180	Sclerotinia sclerotiorum	1980 UF-70
5180	Sclerotinia sclerotiorum	274
5180	Sclerotinia sclerotiorum	Ep-1PNA367
5180	Sclerotinia sclerotiorum	FXGD2
5180	Sclerotinia sclerotiorum	HA61
5180	Sclerotinia sclerotiorum	HLJ4
5180	Sclerotinia sclerotiorum	JRUF1
5180	Sclerotinia sclerotiorum	Scl02-05
5180	Sclerotinia sclerotiorum	Sunf-M
5180	Sclerotinia sclerotiorum	UF1
5180	Sclerotinia sclerotiorum	WMA1
39703	Septoria lycopersici	NEV
615	Serratia marcescens	2170
615	Serratia marcescens	CH-1
615	Serratia marcescens	Db10
615	Serratia marcescens	K904
615	Serratia marcescens	SCBI
615	Serratia marcescens	SM-R
623	Shigella flexneri	2457T
623	Shigella flexneri	M90T
623	Shigella flexneri	M90T-Sm
623	Shigella flexneri	serotype 2a strain 2457T
623	Shigella flexneri	serotype 2a strain 301
1280	Staphylococcus aureus	10833
1280	Staphylococcus aureus	502A
1280	Staphylococcus aureus	923
1280	Staphylococcus aureus	AH1263
1280	Staphylococcus aureus	BA01611
1280	Staphylococcus aureus	BD02-25
1280	Staphylococcus aureus	CA-MRSA ST59 isolate RJ-2
1280	Staphylococcus aureus	CB1634
1280	Staphylococcus aureus	CB5014
1280	Staphylococcus aureus	COL
1280	Staphylococcus aureus	F-182
1280	Staphylococcus aureus	HG001
1280	Staphylococcus aureus	HT20030749
1280	Staphylococcus aureus	JCM2874
1280	Staphylococcus aureus	JE2
1280	Staphylococcus aureus	JSNZ
1280	Staphylococcus aureus	LAC
1280	Staphylococcus aureus	MN8
1280	Staphylococcus aureus	MR23
1280	Staphylococcus aureus	MRSA 252	ATCC BAA-1720, MRSA-252, NCTC 13277
1280	Staphylococcus aureus	MRSA-118
1280	Staphylococcus aureus	MSSA476
1280	Staphylococcus aureus	Mu50
1280	Staphylococcus aureus	NCTC 8325-4
1280	Staphylococcus aureus	Newman
1280	Staphylococcus aureus	Newman D2C
1280	Staphylococcus aureus	NI-13
1280	Staphylococcus aureus	NYU Newman
1280	Staphylococcus aureus	PS47	36 , NCTC 8325
1280	Staphylococcus aureus	RF122
1280	Staphylococcus aureus	RN4220
1280	Staphylococcus aureus	RN6390
1280	Staphylococcus aureus	SA113
1280	Staphylococcus aureus	SA564
1280	Staphylococcus aureus	SA75
1280	Staphylococcus aureus	SAR17
1280	Staphylococcus aureus	SAR2831
1280	Staphylococcus aureus	serotype O11
1280	Staphylococcus aureus	SF8300
1280	Staphylococcus aureus	SH1000
1280	Staphylococcus aureus	ST398
1280	Staphylococcus aureus	UAMS-1
1280	Staphylococcus aureus	USA300
1280	Staphylococcus aureus	USA300 2406	USA300-2406
1280	Staphylococcus aureus	USA300 AH1263
1280	Staphylococcus aureus	USA300 HOU
1280	Staphylococcus aureus	USA300 JE2
1280	Staphylococcus aureus	USA300 LAC
1280	Staphylococcus aureus	USA300 LAC 13C
1280	Staphylococcus aureus	WCUH29
1280	Staphylococcus aureus	Wichita	ATCC 29213
1282	Staphylococcus epidermidis	1457
28035	Staphylococcus lugdunensis	DSM 4804
28035	Staphylococcus lugdunensis	N920143
28035	Staphylococcus lugdunensis	Sl44
28035	Staphylococcus lugdunensis	Sl48
29385	Staphylococcus saprophyticus	7108
29385	Staphylococcus saprophyticus	9325
40324	Stenotrophomonas maltophilia	E77
40324	Stenotrophomonas maltophilia	K279a
40324	Stenotrophomonas maltophilia	KJ
40324	Stenotrophomonas maltophilia	M30
1311	Streptococcus agalactiae	A909
1311	Streptococcus agalactiae	BM110
1311	Streptococcus agalactiae	COH1
1311	Streptococcus agalactiae	GD201008-001
1311	Streptococcus agalactiae	group B serotype V strain CNCTC 10/84
1311	Streptococcus agalactiae	group B strain 83-T-61
1311	Streptococcus agalactiae	NEM316
1311	Streptococcus agalactiae	THN0901
1311	Streptococcus agalactiae	UPSA 807
1336	Streptococcus equi	C74-63	ATCC 35246
1346	Streptococcus iniae	HNM-1
1346	Streptococcus iniae	SF1
1309	Streptococcus mutans	LAR01
1309	Streptococcus mutans	OMZ175
1309	Streptococcus mutans	UA159
1348	Streptococcus parauberis	KSP20
1313	Streptococcus pneumoniae	100993
1313	Streptococcus pneumoniae	4496
1313	Streptococcus pneumoniae	519/43 ST 5316
1313	Streptococcus pneumoniae	6301
1313	Streptococcus pneumoniae	85
1313	Streptococcus pneumoniae	88
1313	Streptococcus pneumoniae	CGMH836
1313	Streptococcus pneumoniae	EF3030
1313	Streptococcus pneumoniae	PN4595-T23
1313	Streptococcus pneumoniae	R6
1313	Streptococcus pneumoniae	serotype 2 strain D39
1313	Streptococcus pneumoniae	serotype 3 strain M23
1313	Streptococcus pneumoniae	serotype 4 strain TIGR4
1313	Streptococcus pneumoniae	WCH16
1313	Streptococcus pneumoniae	WCH43
1313	Streptococcus pneumoniae	WU2
1314	Streptococcus pyogenes	1529
1314	Streptococcus pyogenes	5448
1314	Streptococcus pyogenes	A-20
1314	Streptococcus pyogenes	AP1
1314	Streptococcus pyogenes	D471
1314	Streptococcus pyogenes	GAS M1T1 5448
1314	Streptococcus pyogenes	group A serotype M1
1314	Streptococcus pyogenes	group A serotype M49 strain 591
1314	Streptococcus pyogenes	H3	ATCC 11434
1314	Streptococcus pyogenes	HSC5
1314	Streptococcus pyogenes	M1
1314	Streptococcus pyogenes	M18
1314	Streptococcus pyogenes	M2
1314	Streptococcus pyogenes	M28
1314	Streptococcus pyogenes	M3
1314	Streptococcus pyogenes	M49-16
1314	Streptococcus pyogenes	MGAS10270
1314	Streptococcus pyogenes	MGAS10870
1314	Streptococcus pyogenes	MGAS15252
1314	Streptococcus pyogenes	MGAS2096
1314	Streptococcus pyogenes	MGAS2221
1314	Streptococcus pyogenes	MGAS23530
1314	Streptococcus pyogenes	MGAS27961
1314	Streptococcus pyogenes	MGAS315
1314	Streptococcus pyogenes	MGAS5005
1314	Streptococcus pyogenes	MGAS6180
1314	Streptococcus pyogenes	NZ131
1314	Streptococcus pyogenes	serotype M1 strain 5448
1314	Streptococcus pyogenes	serotype M1 strain 854
1314	Streptococcus pyogenes	serotype M18 strain MGAS8232
1314	Streptococcus pyogenes	serotype M28 strain MGAS28426
1314	Streptococcus pyogenes	serotype M3 strain MGAS10870
1314	Streptococcus pyogenes	serotype M4
1314	Streptococcus pyogenes	serotype M49 strain M49 591	serotype M49 strain 591
1314	Streptococcus pyogenes	serotype M6 strain K006
1314	Streptococcus pyogenes	serotype M89
1314	Streptococcus pyogenes	serotype M89 strain MGAS27556
1314	Streptococcus pyogenes	SF370
1314	Streptococcus pyogenes	SSI-9
36470	Streptococcus sp. 'group a'	5448
36470	Streptococcus sp. 'group a'	serotype M18
1307	Streptococcus suis	05ZY
1307	Streptococcus suis	05ZYH33
1307	Streptococcus suis	10
1307	Streptococcus suis	31533
1307	Streptococcus suis	CVCC606
1307	Streptococcus suis	CZ130302
1307	Streptococcus suis	DAN13730
1307	Streptococcus suis	DN13
1307	Streptococcus suis	GZ0565
1307	Streptococcus suis	JX081101
1307	Streptococcus suis	P1/7
1307	Streptococcus suis	S735
1307	Streptococcus suis	SC-19
1307	Streptococcus suis	SC19
1307	Streptococcus suis	SC84
1307	Streptococcus suis	serotype 2
1307	Streptococcus suis	serotype 2 strain 05ZYH33
1307	Streptococcus suis	serotype 2 strain 10
1307	Streptococcus suis	serotype 2 strain 89/1591
1307	Streptococcus suis	serotype 2 strain P1/7
1307	Streptococcus suis	serotype 2 strain SC19
1307	Streptococcus suis	serotype 2 strain ZY458
1307	Streptococcus suis	serotype 9 strain 1135776
1307	Streptococcus suis	SS2-1
1307	Streptococcus suis	SS9-P10
1307	Streptococcus suis	ST1
1307	Streptococcus suis	ST7 serotype 2 strain SC84
1307	Streptococcus suis	ZY05719
1349	Streptococcus uberis	UT888
1930	Streptomyces scabiei	87.22
85558	Streptomyces turgidiscabies	Car8
286115	Synchytrium endobioticum	pathotype 1(D1) isolate MB42
5811	Toxoplasma gondii	CZ1
5811	Toxoplasma gondii	GT1
5811	Toxoplasma gondii	PLK
5811	Toxoplasma gondii	Prugniaud
5811	Toxoplasma gondii	PruΔKu80	PrudeltaKu80
5811	Toxoplasma gondii	PRY225
5811	Toxoplasma gondii	RH
5811	Toxoplasma gondii	RHΔKu80	RHdeltaKu80
5811	Toxoplasma gondii	TgHB2
5811	Toxoplasma gondii	type Chinese 1 strain WH3
5811	Toxoplasma gondii	type II
5811	Toxoplasma gondii	type II strain ME49
158	Treponema denticola	a	ATCC 35405, CIP 103919, DSM 14222
29875	Trichoderma virens	Gv29-8
29875	Trichoderma virens	Tv10.4
523103	Trichophyton mentagrophytes	360-A
5551	Trichophyton rubrum	CBS 118892
5551	Trichophyton rubrum	NFI 5146
5551	Trichophyton rubrum	NFI 5150
5551	Trichophyton rubrum	NFI 5166
5691	Trypanosoma brucei	427
5693	Trypanosoma cruzi	CL Brener
5693	Trypanosoma cruzi	Dm28c
5693	Trypanosoma cruzi	Tulahuen
5693	Trypanosoma cruzi	Y
1159556	Ustilaginoidea virens	HWD-2
1159556	Ustilaginoidea virens	JZ11-28
1159556	Ustilaginoidea virens	P1
1159556	Ustilaginoidea virens	Uv2-51
120017	Ustilago hordei	Uh364
120017	Ustilago hordei	Uh365
5270	Ustilago maydis	1/2
5270	Ustilago maydis	1/52
5270	Ustilago maydis	15/7
5270	Ustilago maydis	2/9
5270	Ustilago maydis	512
5270	Ustilago maydis	518
5270	Ustilago maydis	521
5270	Ustilago maydis	AB31
5270	Ustilago maydis	AB33
5270	Ustilago maydis	Bub8
5270	Ustilago maydis	CL13
5270	Ustilago maydis	d132
5270	Ustilago maydis	FB
5270	Ustilago maydis	FB1
5270	Ustilago maydis	FB2
5270	Ustilago maydis	FBD11
5270	Ustilago maydis	HA103
5270	Ustilago maydis	HA1033
5270	Ustilago maydis	HA232
5270	Ustilago maydis	LV54
5270	Ustilago maydis	LV7
5270	Ustilago maydis	SG200
5270	Ustilago maydis	SG200AM1
105487	Valsa mali	03-8	03–8
105487	Valsa mali	LXS080601
5025	Venturia inaequalis	WC
27337	Verticillium dahliae	12008
27337	Verticillium dahliae	70V
27337	Verticillium dahliae	70wt-r1
27337	Verticillium dahliae	991
27337	Verticillium dahliae	Dvd-T5
27337	Verticillium dahliae	JR2
27337	Verticillium dahliae	TO22
27337	Verticillium dahliae	V592
27337	Verticillium dahliae	Vd080
27337	Verticillium dahliae	Vd8
27337	Verticillium dahliae	Vd9
27337	Verticillium dahliae	Vd991
27337	Verticillium dahliae	VDG1
27337	Verticillium dahliae	VdGn3
27337	Verticillium dahliae	VdLs.17
27337	Verticillium dahliae	XS11
100787	Verticillium longisporum	Vl43
28171	Vibrio aestuarianus	07_115
55601	Vibrio anguillarum	M93Sm
680	Vibrio campbellii	BB120
666	Vibrio cholerae	C6706
666	Vibrio cholerae	El Tor
666	Vibrio cholerae	El Tor C6706
666	Vibrio cholerae	El Tor Ogawa
666	Vibrio cholerae	JB58
666	Vibrio cholerae	O395
666	Vibrio cholerae	PSU 966
666	Vibrio cholerae	race 5
666	Vibrio cholerae	S2CHK17
666	Vibrio cholerae	serogroup O139
666	Vibrio cholerae	serotype O1 biovar El Tor strain A1552
666	Vibrio cholerae	serotype O1 biovar El Tor strain N16961
666	Vibrio cholerae	SIO
669	Vibrio harveyi	BB120
669	Vibrio harveyi	SF-1
670	Vibrio parahaemolyticus	279	11590, ATCC 33847
670	Vibrio parahaemolyticus	HZ
670	Vibrio parahaemolyticus	M0904
670	Vibrio parahaemolyticus	RIMD 2210633
670	Vibrio parahaemolyticus	VpAHPND 123
212663	Vibrio tasmaniensis	LGP32
672	Vibrio vulnificus	CDC B9629
672	Vibrio vulnificus	CECT4999
672	Vibrio vulnificus	CMCP6
672	Vibrio vulnificus	CMCP6 ΔvvhA Rifr	CMCP6 deltavvhA Rifr
672	Vibrio vulnificus	CMCP6rif
672	Vibrio vulnificus	MO6-24/O
672	Vibrio vulnificus	YJ016
29447	Xanthomonas albilineans	XaFL07-1
53413	Xanthomonas axonopodis	8ra	Xag 8ra
53413	Xanthomonas axonopodis	CFBP1851
53413	Xanthomonas axonopodis	ITCCBD0003
53413	Xanthomonas axonopodis	KU-P-SW005
339	Xanthomonas campestris	17
339	Xanthomonas campestris	8004
339	Xanthomonas campestris	85-10
339	Xanthomonas campestris	97-2
339	Xanthomonas campestris	B186
339	Xanthomonas campestris	Bv5-4a
339	Xanthomonas campestris	Ds1
339	Xanthomonas campestris	Xc1
339	Xanthomonas campestris	Xc17	Xcc17
339	Xanthomonas campestris	XcFC2
346	Xanthomonas citri	306
346	Xanthomonas citri	99-1330
346	Xanthomonas citri	H1005
346	Xanthomonas citri	Xcc99-1330
346	Xanthomonas citri	XHG3
346	Xanthomonas citri	Xss-V2–18	Xss-V2-18
346	Xanthomonas citri	XW19
456327	Xanthomonas euvesicatoria	UPB139
456327	Xanthomonas euvesicatoria	Xe85-10
56454	Xanthomonas hortorum	305
347	Xanthomonas oryzae	13751
347	Xanthomonas oryzae	BAI3
347	Xanthomonas oryzae	BLS256
347	Xanthomonas oryzae	BXO1
347	Xanthomonas oryzae	BXO43
347	Xanthomonas oryzae	GX01
347	Xanthomonas oryzae	IR42
347	Xanthomonas oryzae	KACC 10331
347	Xanthomonas oryzae	MAFF 311018
347	Xanthomonas oryzae	MAI10
347	Xanthomonas oryzae	PXO124
347	Xanthomonas oryzae	PXO99
347	Xanthomonas oryzae	PXO99A
347	Xanthomonas oryzae	RS105
347	Xanthomonas oryzae	X11-5A
347	Xanthomonas oryzae	XKK.12
347	Xanthomonas oryzae	ZJ173
343	Xanthomonas translucens	ART-Xtg29
343	Xanthomonas translucens	NXtc01
628	Xenorhabdus nematophila	ATCC 19061
628	Xenorhabdus nematophila	F1
2371	Xylella fastidiosa	9a5c
2371	Xylella fastidiosa	EB92-1
2371	Xylella fastidiosa	Fetzer
2371	Xylella fastidiosa	Stag's Leap
2371	Xylella fastidiosa	Temecula
2371	Xylella fastidiosa	Temecula1
2371	Xylella fastidiosa	TemeculaL
2371	Xylella fastidiosa	WM1-1
630	Yersinia enterocolitica	JB580v
630	Yersinia enterocolitica	serotype O:3 strain 6471/76
630	Yersinia enterocolitica	serotype O:8
630	Yersinia enterocolitica	WA-314
630	Yersinia enterocolitica	YE12/03
632	Yersinia pestis	201
632	Yersinia pestis	91001
632	Yersinia pestis	biovar Microtus strain 91001
632	Yersinia pestis	CO92
632	Yersinia pestis	GB
632	Yersinia pestis	KIM/D27
632	Yersinia pestis	KIM1001
632	Yersinia pestis	KIM5
632	Yersinia pestis	Kim53
632	Yersinia pestis	KIM6+
633	Yersinia pseudotuberculosis	32777
633	Yersinia pseudotuberculosis	488
633	Yersinia pseudotuberculosis	IP2666
633	Yersinia pseudotuberculosis	IP32953
633	Yersinia pseudotuberculosis	YP126
633	Yersinia pseudotuberculosis	YP216
633	Yersinia pseudotuberculosis	YPIII
633	Yersinia pseudotuberculosis	YPIII/pIB102
29486	Yersinia ruckeri	150
29486	Yersinia ruckeri	SC09
1047171	Zymoseptoria tritici	Berdun 4
1047171	Zymoseptoria tritici	IPO323
1047171	Zymoseptoria tritici	IPO323 ΔKu70	IPO323 deltaKu70
1047171	Zymoseptoria tritici	IPO323 ΔKu80	IPO323 deltaKu80
1047171	Zymoseptoria tritici	K1562
1047171	Zymoseptoria tritici	R6-31
1047171	Zymoseptoria tritici	ST1/MBC
1047171	Zymoseptoria tritici	ST99CH_1E4
1047171	Zymoseptoria tritici	V103.9
1047171	Zymoseptoria tritici	V115.3
1047171	Zymoseptoria tritici	V202.1
1047171	Zymoseptoria tritici	V209.10
1047171	Zymoseptoria tritici	V209.9
1047171	Zymoseptoria tritici	V212.2
1047171	Zymoseptoria tritici	V214.7
1047171	Zymoseptoria tritici	ΔKu80	deltaKu80

## Sheet: Host strains
ncbi_taxid	scientific_name	strain	synonyms	cross_references
5755	Acanthamoeba castellanii	ATCC 30010
5755	Acanthamoeba castellanii	ATCC 30234
5757	Acanthamoeba polyphaga	Linc Ap-1
3625	Actinidia chinensis	cv. Hongyang
3625	Actinidia chinensis	cv. Hort16A
4679	Allium cepa	cv. Hendrix
4679	Allium cepa	cv. Napoleon
4679	Allium cepa	cv. Texas Grano
8839	Anas platyrhynchos	Cherry Valley
8839	Anas platyrhynchos	HBK-Q-SPF
30069	Anopheles stephensi	Dutch strain
4045	Apium graveolens	dulce group
3702	Arabidopsis thaliana	ecotype Columbia
3702	Arabidopsis thaliana	ecotype Columbia-0	ecotype Col-0
3702	Arabidopsis thaliana	ecotype Columbia-5	ecotype Col-5
3702	Arabidopsis thaliana	ecotype CW84
3702	Arabidopsis thaliana	ecotype Landsberg erecta	ecotype Ler-0
3702	Arabidopsis thaliana	ecotype N70000
3702	Arabidopsis thaliana	ecotype Niederzenz-0	ecotype Nd-0
3702	Arabidopsis thaliana	ecotype Niederzenz-1	ecotype Nd-1
3702	Arabidopsis thaliana	ecotype Nossen-0	ecotype No-0
3702	Arabidopsis thaliana	ecotype Wassilewskija
3702	Arabidopsis thaliana	ecotype Wassilewskija-0	ecotype Ws-0
3702	Arabidopsis thaliana	ecotype Weiningen-0	ecotype Wei-0
3702	Arabidopsis thaliana	ecotype Ws-eds1
3702	Arabidopsis thaliana	PG201 line
3702	Arabidopsis thaliana	RIL 3860	3860 line, Recombinant Inbred Line 3860
3818	Arachis hypogaea	cv. NC94022
6661	Artemia franciscana	San Francisco Bay Brand ASF65031
4498	Avena sativa	cv. Porter
38783	Avena strigosa	cv. Hayoat
9913	Bos taurus	Angus cross
9913	Bos taurus	BoMac cell line	Bovine Mammary Alveolar cells
9913	Bos taurus	EBL cell line	Embryonic Bovine Lung
9913	Bos taurus	Holstein Friesian
9913	Bos taurus	MAC-T cell line
9913	Bos taurus	MDBK cell line	Madin Darby Bovine Kidney, NBL-1	BTO:0000836, CVCL_U226
15368	Brachypodium distachyon	Bd21-3 line
15368	Brachypodium distachyon	cv. Bd21
3708	Brassica napus	cv. 01-23-2
3708	Brassica napus	cv. 01-23-2-1
3708	Brassica napus	cv. 02-22-2-1
3708	Brassica napus	cv. 1135
3708	Brassica napus	cv. Columbus
3708	Brassica napus	cv. Darmor
3708	Brassica napus	cv. DH Topas
3708	Brassica napus	cv. Eurol
3708	Brassica napus	cv. Forge
3708	Brassica napus	cv. Glacier
3708	Brassica napus	cv. Goeland
3708	Brassica napus	cv. Jet Neuf
3708	Brassica napus	cv. MT29
3708	Brassica napus	cv. Surpass400
3708	Brassica napus	cv. Westar
3708	Brassica napus	cv. Zhongshuang 10
3708	Brassica napus	cv. Zhongshuang 11
3708	Brassica napus	cv. Zhongshuang 9
3708	Brassica napus	cv. Zhongyou 821
3708	Brassica napus	Z1 line
3712	Brassica oleracea	cv. Bartolo
3712	Brassica oleracea	cv. Capitata
3712	Brassica oleracea	cv. Jingfeng No. 1
3712	Brassica oleracea	cv. Kinkei 201
3711	Brassica rapa	cv. Zhong Gan 21
6239	Caenorhabditis elegans	BW54		WBStrain00003956
6239	Caenorhabditis elegans	CF512		WBStrain00004828
6239	Caenorhabditis elegans	DH26		WBStrain00005805
6239	Caenorhabditis elegans	N2	Bristol N2	WBStrain00000001
9612	Canis lupus	MDCK cell line	Madin-Darby canine kidney cell line	BTO:0000837, CVCL_0422
4072	Capsicum annuum	06221 line
4072	Capsicum annuum	cv. Bugang
4072	Capsicum annuum	cv. CA8
4072	Capsicum annuum	cv. Early Calwonder	cv. ECW
4072	Capsicum annuum	cv. Early Calwonder 10R	cv. ECW 10R
4072	Capsicum annuum	cv. Early Calwonder 20R	cv. ECW 20R
4072	Capsicum annuum	cv. Early Calwonder 30R	cv. ECW 30R
4072	Capsicum annuum	cv. Groupzest
4072	Capsicum annuum	cv. Hanyu
4072	Capsicum annuum	cv. Kexing 3
4072	Capsicum annuum	cv. Maor
4072	Capsicum annuum	cv. Nockwang
4072	Capsicum annuum	cv. PM659
4072	Capsicum annuum	cv. PM687
10141	Cavia porcellus	Duncan-Hartley
10141	Cavia porcellus	Hartley
9534	Chlorocebus aethiops	CCL-81
9534	Chlorocebus aethiops	COS7 cell line	CV-1 in Origin Simian-7, Cos-7	BTO:0000298, CVCL_0224
9534	Chlorocebus aethiops	THP-1
9534	Chlorocebus aethiops	Vero cell line	Verda reno, Vero 81, VeroCCL81	BTO:0001444, CVCL_0059
3827	Cicer arietinum	cv. Dwelley
3827	Cicer arietinum	cv. P-256
3827	Cicer arietinum	cv. Spanish White
2708	Citrus limon	cv. Eureka
2708	Citrus limon	cv. Genova
2708	Citrus limon	cv. Tahiti
85571	Citrus reticulata	cv. Blanco
85571	Citrus reticulata	cv. Hongjv
85571	Citrus reticulata	cv. Orah
85571	Citrus reticulata	cv. Ponkan
85571	Citrus reticulata	cv. Xinhuigan
2711	Citrus sinensis	cv. Clemenules
2711	Citrus sinensis	cv. Eureka
2711	Citrus sinensis	cv. Hamlin
2711	Citrus sinensis	cv. Lane late
2711	Citrus sinensis	cv. Lanelate
2711	Citrus sinensis	cv. Natal
2711	Citrus sinensis	cv. Navel
2711	Citrus sinensis	cv. Navelate
2711	Citrus sinensis	cv. Navelina
2711	Citrus sinensis	cv. Pera
2711	Citrus sinensis	cv. Pera Rio
2711	Citrus sinensis	cv. Pineapple
2711	Citrus sinensis	cv. Sorocaba
2711	Citrus sinensis	cv. Valencia
164113	Citrus x microcarpa	cv. Blanco
37656	Citrus x paradisi	cv. Duncan
37656	Citrus x paradisi	cv. Macfadyen
229630	Citrus x tangelo	cv. Blanco
3656	Cucumis melo	cv. Amus
3656	Cucumis melo	cv. Cha-T
3656	Cucumis melo	cv. Ein Dor
3659	Cucumis sativus	cv. 9930
3659	Cucumis sativus	cv. Suyo
3659	Cucumis sativus	cv. Xinjinyou 1
3659	Cucumis sativus	cv. Zhong Nong 16
3661	Cucurbita maxima	cv. Crown
3661	Cucurbita maxima	cv. Delica
3661	Cucurbita maxima	cv. Triamble
7955	Danio rerio	AB
7955	Danio rerio	AB/TL
7955	Danio rerio	Casper
7955	Danio rerio	Tübingen
44689	Dictyostelium discoideum	AX2
44689	Dictyostelium discoideum	AX3
44689	Dictyostelium discoideum	AX4
44689	Dictyostelium discoideum	DH1-10
7227	Drosophila melanogaster	Canton-S
7227	Drosophila melanogaster	Oregon R
7227	Drosophila melanogaster	Toll mutant
9796	Equus caballus	EO cell line
3747	Fragaria x ananassa	cv. Hapil
3747	Fragaria x ananassa	cv. Morioka
7137	Galleria mellonella	ATCC 26933
7137	Galleria mellonella	TruLarv
9031	Gallus gallus	Bovans Brown
9031	Gallus gallus	CEC-32 cell line		BTO:0004096, CVCL_D160
9031	Gallus gallus	Cobb
9031	Gallus gallus	Hy-line
9031	Gallus gallus	Hy-line brown
9031	Gallus gallus	Hy-line white
9031	Gallus gallus	Leghorn
9031	Gallus gallus	Lohmann Brown
9031	Gallus gallus	LSCC-HD11 cell line	HD-11, HD11
9031	Gallus gallus	PBMCs	Peripheral Blood Mononuclear Cells
9031	Gallus gallus	Roman hens
9031	Gallus gallus	Ross 308
9031	Gallus gallus	Ross 708
9031	Gallus gallus	UMNSAH/DF-1 cell line	DF-1, DF1, Douglas Foster-1, UMNSAHDF1
9031	Gallus gallus	White Leghorn
9031	Gallus gallus	White Plymouth Rock
3847	Glycine max	cv. Demetra
3847	Glycine max	cv. Essex
3847	Glycine max	cv. Flambeau
3847	Glycine max	cv. Haro 16
3847	Glycine max	cv. Harosoy
3847	Glycine max	cv. Hefeng 47
3847	Glycine max	cv. Jinju1
3847	Glycine max	cv. Merit
3847	Glycine max	cv. Norchief
3847	Glycine max	cv. Peking
3847	Glycine max	cv. Spencer
3847	Glycine max	cv. Williams
3847	Glycine max	cv. Williams 82
3635	Gossypium hirsutum	cv. Chuangxin
3635	Gossypium hirsutum	cv. Coker 312
3635	Gossypium hirsutum	cv. Deltapine 50
3635	Gossypium hirsutum	cv. FM1944
3635	Gossypium hirsutum	cv. Guoxin
3635	Gossypium hirsutum	cv. Jimian 11
3635	Gossypium hirsutum	cv. Junmian 1
3635	Gossypium hirsutum	cv. Paymaster 2326 BG/RR
3635	Gossypium hirsutum	cv. R15
3635	Gossypium hirsutum	cv. TM-1
4232	Helianthus annuus	cv. LD5009
3981	Hevea brasiliensis	cv. 73-3-97
9606	Homo sapiens	16HBE14o- cell line	16-HBE14o, 16-HBEo, 16HBE, 16HBEo-	BTO:0002734, CVCL_0112
9606	Homo sapiens	5637 cell line	HBC 5637, HTB9, Human Bladder Carcinoma 5637	BTO:0003137, CVCL_0126
9606	Homo sapiens	A-172 cell line	A-172MG, A172	BTO:0000016, CVCL_0131
9606	Homo sapiens	A-549 cell line	A549	BTO:0000018, CVCL_0023
9606	Homo sapiens	AGS cell line		BTO:0001007, CVCL_0139
9606	Homo sapiens	C2BBe1 cell line	BBE, Caco-2/BBe, Caco-2BBE1	BTO:0003643, CVCL_1096
9606	Homo sapiens	Caco-2 cell line	ATCC HTB-37, Caco2	CVCL_0025
9606	Homo sapiens	Caco-2/TC7 cell line	Caco2/TC7	BTO:0003643, CVCL_0233
9606	Homo sapiens	CFBE41o- cell line	CF41o, CFBE	CVCL_HL93
9606	Homo sapiens	Detroit 562 cell line	D562, Det 562
9606	Homo sapiens	EA.hy 926 cell line	EA.hy296, EAHY-926, EAhy926
9606	Homo sapiens	FaDu cell line
9606	Homo sapiens	GES-1 cell line	GES1
9606	Homo sapiens	HaCaT cell line
9606	Homo sapiens	HAP1 cell line	HAP-1
9606	Homo sapiens	HBE cell line	Human Bronchial Epithelial Cell Line
9606	Homo sapiens	HBMEC-IM	BMEC, Human Brain Microvascular Endothelial Cells
9606	Homo sapiens	HCAEC	Human Coronary Artery Endothelial Cells
9606	Homo sapiens	HCMEC	Human Cardiac Microvascular Endothelial Cells
9606	Homo sapiens	hCMEC/D3 cell line	human cortical microvessels endothelial cells/D3
9606	Homo sapiens	HCT 116 cell line	CoCL2, HCT116
9606	Homo sapiens	HDMEC-IM cell line	Human Dermal Microvascular Endothelial Cells-IMmortalized
9606	Homo sapiens	HEK-293 cell line	HEK293, human embryonic kidney 293
9606	Homo sapiens	HEK-293ET cell line	293ET, HEK293ET, human embryonic kidney 293ET	BTO:0005548, CVCL_6996
9606	Homo sapiens	HEK293T cell line	293T, ATCC CRL-3216, HEK-293T, human embryonic kidney 293T	BTO:0002181, CVCL_0063
9606	Homo sapiens	HeLa 229 cell line	HeLa229
9606	Homo sapiens	HeLa cell line	HeLa CCL2, Henrietta Lacks cells
9606	Homo sapiens	Hela229 SEAP cell line
9606	Homo sapiens	Henle cell line	Henle
9606	Homo sapiens	HEp-2 cell line	Hep2, human epidermoid carcinoma #2, human epithelioma 2
9606	Homo sapiens	Hep-G2 cell line	HepG2
9606	Homo sapiens	HepG2 cell line
9606	Homo sapiens	HFF cell line	human foreskin fibroblast
9606	Homo sapiens	HL-60 cell line	HL60
9606	Homo sapiens	hMDMs	Human Monocyte-Derived Macrophages
9606	Homo sapiens	HMEC-1 cell line	HMEC1, human microvascular endothelial cell line 1
9606	Homo sapiens	HPEK cell line
9606	Homo sapiens	HT-29 cell line	HT29
9606	Homo sapiens	HT-29-MTX cell line	HT29 MTX
9606	Homo sapiens	HT-29/B6 cell line	HT29 B6
9606	Homo sapiens	hTERT TIGKs cell line	TIGK, TIGKs, Telomerase Immortalized Gingival Keratinocytes	CVCL_M095
9606	Homo sapiens	Huh-7 cell line	Huh7, JTC-39, Japanese tissue culture 39
9606	Homo sapiens	HUVEC-C cell line	HUVEC, Human Umbilical Vein Endothelial Cells
9606	Homo sapiens	HVEC cell line	Human Vaginal Epithelial Cells, V428
9606	Homo sapiens	IB3-1 cell line	IB3
9606	Homo sapiens	IMR-32 cell line	AG03320, AG3320, GM03320, GM03320D, GM3320C, IMR32, Institute for Medical Research 32	BTO:0000934, CVCL_0346
9606	Homo sapiens	Intestine 407 cell line	Henle 407, INT 407	BTO:0000633, CVCL_1907
9606	Homo sapiens	J82 cell line	J-82, J82COT	BTO:0001671, CVCL_0359
9606	Homo sapiens	LCL 18592	Lymphoblastoid Cell Line 18592
9606	Homo sapiens	LS174T cell line	LS-174T	BTO:0001553, CVCL_1384
9606	Homo sapiens	MCF-7 cell line	IBMF-7, MCF7-CTRL, MCF7/WT, Michigan Cancer Foundation 7, ssMCF-7	BTO:0000093, CVCL_0031
9606	Homo sapiens	MDA cell line
9606	Homo sapiens	MKN28 cell line	MKN-28	BTO:0002381, CVCL_1416
9606	Homo sapiens	MRC-5 cell line	MRCV, Medical Research Council cell strain-5	BTO:0001590, CVCL_0440
9606	Homo sapiens	NCI-H292
9606	Homo sapiens	PBMCs	Peripheral Blood Mononuclear Cells
9606	Homo sapiens	S1 cell line		BTO:0006275, CVCL_0H88
9606	Homo sapiens	SF268 cell line	SF-268	BTO:0003772, CVCL_1689
9606	Homo sapiens	SW480 cell line	SW-480	BTO:0000038, CVCL_0546
9606	Homo sapiens	SW620 cell line	SW-620	BTO:0000675, CVCL_0547
9606	Homo sapiens	T-REx-293 cell line	T-REx HEK 293, TREx-293	BTO:0005238, CVCL_D585
9606	Homo sapiens	T24 cell line	T-24	BTO:0001345, CVCL_0554
9606	Homo sapiens	T84 cell line	ATCC CCL-248, T-84	BTO:0002032, CVCL_0555
9606	Homo sapiens	T98G cell line	T-98G	BTO:0001583, CVCL_0556
9606	Homo sapiens	THP-1 cell line	O-THP-1, THP-1(ATCC), Tohoku Hospital Pediatrics-1	BTO:0001370, CVCL_0006
9606	Homo sapiens	TR146 cell line	TR-146	BTO:0002718, CVCL_2736
9606	Homo sapiens	U-251MG cell line	251MG, U251, U251MG, U251N	BTO:0002035, CVCL_0021
9606	Homo sapiens	U-937 cell line	ATCC CRL-1593.2, U937	BTO:0001412, CVCL_0007
9606	Homo sapiens	U2OS	2T, U-2 OS, U-2-OS, U-2OS, U2-OS, U20-S, U20S	CVCL_0042
4513	Hordeum vulgare	cv. Atlas
4513	Hordeum vulgare	cv. Atlas 46
4513	Hordeum vulgare	cv. Barke
4513	Hordeum vulgare	cv. Bowman
4513	Hordeum vulgare	cv. CDC Silky
4513	Hordeum vulgare	cv. CO-39
4513	Hordeum vulgare	cv. E9
4513	Hordeum vulgare	cv. Express
4513	Hordeum vulgare	cv. Four-arris
4513	Hordeum vulgare	cv. Golden Promise	cv. GP
4513	Hordeum vulgare	cv. Ingrid
4513	Hordeum vulgare	cv. Jinchang 1316
4513	Hordeum vulgare	cv. Kenpi-7
4513	Hordeum vulgare	cv. Kindred
4513	Hordeum vulgare	cv. Lacey
4513	Hordeum vulgare	cv. Nakaizumi
4513	Hordeum vulgare	cv. Nakaizumi-zairai
4513	Hordeum vulgare	cv. NB6
4513	Hordeum vulgare	cv. Nigrate
4513	Hordeum vulgare	cv. Odessa
4513	Hordeum vulgare	cv. Plaisant
4513	Hordeum vulgare	cv. Sangrok
4513	Hordeum vulgare	cv. Sprout Master
4513	Hordeum vulgare	cv. Tipple
4513	Hordeum vulgare	cv. Turk
4513	Hordeum vulgare	cv. ZJ-8
4236	Lactuca sativa	cv. Butter head
4236	Lactuca sativa	cv. Capitata
4236	Lactuca sativa	cv. Flandria
4236	Lactuca sativa	cv. Kordaat
4236	Lactuca sativa	cv. Romaine
4236	Lactuca sativa	cv. Salinas
3864	Lens culinaris	cv. Eston
4522	Lolium perenne	cv. Nui
3750	Malus domestica	cv. Ariane
3750	Malus domestica	cv. Avrolles
3750	Malus domestica	cv. Bedan
3750	Malus domestica	cv. Braeburn
3750	Malus domestica	cv. Fréquin Rouge
3750	Malus domestica	cv. Fuji
3750	Malus domestica	cv. Gala
3750	Malus domestica	cv. Golden Delicious
3750	Malus domestica	cv. Golden Smoothie
3750	Malus domestica	cv. Granny Smith
3750	Malus domestica	cv. Holsteiner Cox
3750	Malus domestica	cv. Idared
3750	Malus domestica	cv. Marie Ménard
3750	Malus domestica	cv. Petit Jaune
3750	Malus domestica	cv. Pink Lady
3750	Malus domestica	cv. Pinova
3750	Malus domestica	cv. Reinette grise du Canada
3750	Malus domestica	cv. Saireline
3750	Malus domestica	MM106	MM 106
106564	Malus prunifolia	cv. Ringo
3983	Manihot esculenta	cv. HMC-1
3879	Medicago sativa	cv. 57Q77
3880	Medicago truncatula	cv. A17
10036	Mesocricetus auratus	BHK-21 cell line	BHK, Baby Hamster Kidney 21	BTO:0000120, CVCL_1914
10036	Mesocricetus auratus	CHO cell line	CHO-ori, Chinese Hamster Ovary	BTO:0000246, CVCL_0213
10036	Mesocricetus auratus	CHO-K1 cell line	CHO cell clone K1, GM15452	BTO:0000457, CVCL_0214
10036	Mesocricetus auratus	Hines model
10090	Mus musculus	(C57BL x CBA)F1		MGI:5649732
10090	Mus musculus	129S-Hfe<tm1.1Nca>/Auer
10090	Mus musculus	129S-Hjv<tm1Nca>/Auer		MGI:6390155
10090	Mus musculus	129S6/SvEvTac		MGI:3044417
10090	Mus musculus	129S7/SvEvBrd-Hprt<+>		MGI:3687635
10090	Mus musculus	129X1(B6)-Camp<tm1Rlg>/Kini		MGI:3639694
10090	Mus musculus	129X1/SvJ	129/SvJ, 129X1	MGI:3044210
10090	Mus musculus	A/J	A, AJ	MGI:2159747
10090	Mus musculus	A/JCr		MGI:6156905
10090	Mus musculus	A/JJmsSlc	A/JSlc	MGI:2160468
10090	Mus musculus	A/JUnib
10090	Mus musculus	B6.Cg-Tg(Alb-PLG)1Dgi/J	B6(SJL)-Tg(Alb-PLG)1Dgi/J	MGI:3764459
10090	Mus musculus	B6;129S7-Dbh<tm1Rpa>/Rpa		MGI:6389575
10090	Mus musculus	B6;129X1-Mpeg1<tm1Pod>/Pod		MGI:6389574
10090	Mus musculus	B6;SJLJ-Tg(Alb-PLG)1Dgi/Uqah		MGI:6390159
10090	Mus musculus	BALB		MGI:5652307
10090	Mus musculus	BALB/c	BALB/c-Mx1<s1>, Bagg Albino	MGI:2161072
10090	Mus musculus	BALB/cBy	BALB Bailey, BALB/c Bailey, Bagg Albino Bailey, CBy	MGI:2159790
10090	Mus musculus	BALB/cByJ	BALB Bailey Jackson, BALB/c Bailey Jackson	MGI:2159771
10090	Mus musculus	BALB/cByJSlacc	BALB/cByJSlac	MGI:6272006
10090	Mus musculus	BALB/cJ	BALBc, C	MGI:2159737
10090	Mus musculus	bEnd.3 cell line	b.End3, bEnd3, brain-derived Endothelial cells.3	BTO:0003353, CVCL_0170
10090	Mus musculus	BoMaMa-J2imm cell line	NR-9456, NR9456, macrophage cell line derived from wild type mice	CVCL_A7WX
10090	Mus musculus	BV-2 cell line	BV2	BTO:0003350, CVCL_0182
10090	Mus musculus	C.B-17/Icr<scid>
10090	Mus musculus	C.B-17IcrHanHsdArc-Prkdc<scid>		MGI:6188036
10090	Mus musculus	C.B-17IcrHsd-Prkdc<scid>
10090	Mus musculus	C.NU	BALB/c.NU	MGI:2160727
10090	Mus musculus	C3H	C3, C3Hf	MGI:2160217
10090	Mus musculus	C3H/HeJ	C3, C3H Heston, C3H/HeJ-Pde6b<rd1>	MGI:2159741
10090	Mus musculus	C3H/HeN	C3Hf/HeN	MGI:2160972
10090	Mus musculus	C3H/HeNHsd		MGI:2160839
10090	Mus musculus	C3H/HeOuJ	C3H Outzen, C3Ou	MGI:2159855
10090	Mus musculus	C3HeB/FeJ	C3Fe, C3H Fekete, HeB	MGI:2159873
10090	Mus musculus	C57BL/6	B6, Black 6, C57BL/6-Mx1<s1>	MGI:2159769
10090	Mus musculus	C57BL/6<scid>
10090	Mus musculus	C57BL/6J	B6, B6J, Black 6, C57 Black	MGI:3028467
10090	Mus musculus	C57BL/6JJcl		MGI:3055581
10090	Mus musculus	C57BL/6JOlaHsd	C57BL/6HUK, C57BL/6S	MGI:2164189
10090	Mus musculus	C57BL/6N		MGI:2159965
10090	Mus musculus	C57BL/6NCr		MGI:2160593
10090	Mus musculus	C57BL/6NCrl	C57BL/6NCrlBR, C57BL/6NCrlBr	MGI:2683688
10090	Mus musculus	C57BL/6NHsd		MGI:2161078
10090	Mus musculus	C57BL/6NJ	B6N, Black 6N, C57BL/6NCrJ	MGI:3056279
10090	Mus musculus	CBA	C, CB, XXXIX	MGI:2159850
10090	Mus musculus	CBA/J	CBA Jackson, CBA/J-Mx1<s2>, CBA/J-Pde6b<rd1>	MGI:2159756
10090	Mus musculus	CBA/JCrHsd		MGI:6159769
10090	Mus musculus	CBySmn.Cg-Prkdc<scid>/J	BALB scid, BALB/c scid, CBySmn.CB17-Prkdc<scid>/J	MGI:2161598
10090	Mus musculus	CD-1	Crl:CD1(ICR)	MGI:5649524
10090	Mus musculus	CEABAC10
10090	Mus musculus	CF1	Crl:CF1	MGI:5649679
10090	Mus musculus	Crl:CFW	Crl:CFW(SW), Swiss Webster	MGI:5911387
10090	Mus musculus	Crl:SKH1-Hr<hr>	SKH1
10090	Mus musculus	CrlOri:CD-1
10090	Mus musculus	CrlOri:CD-1(ICR)
10090	Mus musculus	DBA/2	D2	MGI:2159768
10090	Mus musculus	DBA/2J	D2, D2J, DBA2	MGI:2684695
10090	Mus musculus	FVB/N	FVB/N-Pde6b<rd1>, Friend Virus B NIH	MGI:2160001
10090	Mus musculus	hCD46Ge
10090	Mus musculus	Hos:HR-1		MGI:6256468
10090	Mus musculus	Hsd:ICR	Hsd:ICR (CD-1), Hsd:ICR(CD-1), ICR/Hsd	MGI:5652530
10090	Mus musculus	Hsd:ND4		MGI:6390178
10090	Mus musculus	hu-SRC-SCID
10090	Mus musculus	ICR	IcrTac:ICR	MGI:2160272
10090	Mus musculus	J774 cell line	J-774	BTO:0002279, CVCL_4692
10090	Mus musculus	J774.16 cell line	J774-1.6	CVCL_HA24
10090	Mus musculus	J774.2 cell line		BTO:0001030, CVCL_0357
10090	Mus musculus	J774A1 cell line	J-774A.1, J774A.1	BTO:0000804, CVCL_0358
10090	Mus musculus	KI E16P
10090	Mus musculus	Kunming	KM mouse, Kongmin, Kongmin White, Kunmin	MGI:5651867
10090	Mus musculus	L2 cell line	L2	CVCL_0383
10090	Mus musculus	L929 cell line	Earles's L cells, L cell, NCTC 929, clone 929	BTO:0000331, CVCL_0462
10090	Mus musculus	LA-4 cell line	LA4
10090	Mus musculus	LACA	Laboratory Animal Centre Albino	MGI:6192698
10090	Mus musculus	LL/2 (LLC1) cell line	LL2, Lewis lung carcinoma line 1	BTO:0000181, CVCL_4358
10090	Mus musculus	mBMDCs	murine Bone Marrow-derived Dendritic Cells
10090	Mus musculus	mBMDMs	murine Bone Marrow-Derived Macrophages
10090	Mus musculus	MC-38 cell line	C38, MC38, MCA38, Mouse Colon 38, Murine Carcinoma-38	BTO:0004163, CVCL_B288
10090	Mus musculus	MF1		MGI:5649831
10090	Mus musculus	MH-S cell line		CVCL_3855
10090	Mus musculus	MLE-12 cell line	murine lung epithelial-12	BTO:0002268, CVCL_3751
10090	Mus musculus	MS1 cell line	MS-1, Mile Sven 1	BTO:0006355, CVCL_6502
10090	Mus musculus	NIH 3T3 cell line	3T3, 3T3NIH, 3T3Swiss, NIH3T3, Swiss3T3	BTO:0000944, CVCL_0594
10090	Mus musculus	NIH Swiss		MGI:5649526
10090	Mus musculus	NMRI		MGI:2160177
10090	Mus musculus	OF1		MGI:5649743
10090	Mus musculus	RAW 264.7 cell line		BTO:0003292, CVCL_YJ39
10090	Mus musculus	Rj:SWISS	RjOrl:SWISS	MGI:5603077
10090	Mus musculus	SCID	Severe Combined Immunodeficiency
10090	Mus musculus	SKH1	SKH-1	MGI:2162583
10090	Mus musculus	Slc:ICR		MGI:5462094
10090	Mus musculus	SPF CD-1
10090	Mus musculus	Swiss albino		MGI:5652853
10090	Mus musculus	Swiss Webster	Swiss-Webster, Tac:SW	MGI:2160840
10090	Mus musculus	Swiss white
10090	Mus musculus	Swiss white Hla (ICR)CVF
10090	Mus musculus	SWR	SW, Swiss, Swiss-8, Swiss-R	MGI:2159803
10090	Mus musculus	Y1 cell line		BTO:0000046, CVCL_0585
4641	Musa acuminata	cv. Baxi
4641	Musa acuminata	cv. Brazil
4641	Musa acuminata	cv. Brazilian
4641	Musa acuminata	cv. BX
4641	Musa acuminata	cv. Grand Nain
4641	Musa acuminata	cv. Guangfen-1
4641	Musa acuminata	cv. Rasthali
4641	Musa acuminata	Nakitembe clone set
63479	Nerium oleander	Cesena Italy
4100	Nicotiana benthamiana	cv. NC-95
4100	Nicotiana benthamiana	cv. Xanthi-nc
4097	Nicotiana tabacum	cv. Bright Yellow
4097	Nicotiana tabacum	cv. Burley 21
4097	Nicotiana tabacum	cv. Burley White
4097	Nicotiana tabacum	cv. Havana
4097	Nicotiana tabacum	cv. Havana 425
4097	Nicotiana tabacum	cv. Honghuadajinyuan
4097	Nicotiana tabacum	cv. K326
4097	Nicotiana tabacum	cv. NC89
4097	Nicotiana tabacum	cv. Petit Havana
4097	Nicotiana tabacum	cv. Petit Havana SR1
4097	Nicotiana tabacum	cv. RP-1
4097	Nicotiana tabacum	cv. Samsun
4097	Nicotiana tabacum	cv. Samsun NN
4097	Nicotiana tabacum	cv. Xanthi
4146	Olea europaea	cv. Arbequina
8128	Oreochromis niloticus	Nile tilapia
9986	Oryctolagus cuniculus	New Zealand White
4530	Oryza sativa	Ashwina landrace
4530	Oryza sativa	Azucena landrace
4530	Oryza sativa	cv. 51583
4530	Oryza sativa	cv. Aichi asahi
4530	Oryza sativa	cv. Amaroo
4530	Oryza sativa	cv. Baldo
4530	Oryza sativa	cv. Bengal
4530	Oryza sativa	cv. CO-39
4530	Oryza sativa	cv. Cypress
4530	Oryza sativa	cv. Dom Sufid
4530	Oryza sativa	cv. Dongjin	cv. Dongjinbyeo, cv. Donjin, cv. Donjinbyeo, cv. IR348
4530	Oryza sativa	cv. Drew
4530	Oryza sativa	cv. Dular
4530	Oryza sativa	cv. FR13A
4530	Oryza sativa	cv. Golden Promise	cv. GP
4530	Oryza sativa	cv. Hitomebore
4530	Oryza sativa	cv. HR-12
4530	Oryza sativa	cv. HR12
4530	Oryza sativa	cv. Hwayeongbye
4530	Oryza sativa	cv. Ilimi
4530	Oryza sativa	cv. IR24
4530	Oryza sativa	cv. IR64-21
4530	Oryza sativa	cv. Jijing88
4530	Oryza sativa	cv. Jingang 30
4530	Oryza sativa	cv. Jinhe 2
4530	Oryza sativa	cv. Jinheung
4530	Oryza sativa	cv. JJ88
4530	Oryza sativa	cv. K60
4530	Oryza sativa	cv. Kakehashi
4530	Oryza sativa	cv. Kanto 51
4530	Oryza sativa	cv. Katy
4530	Oryza sativa	cv. Kitaake
4530	Oryza sativa	cv. Koshihikari
4530	Oryza sativa	cv. Liangyoupeijiu	cv. LYP, cv. LYPJ
4530	Oryza sativa	cv. Liangyoupeijiu 9	cv. LYP9, cv. LYPJ9
4530	Oryza sativa	cv. Lijiangxintuanheigu	cv. LTH
4530	Oryza sativa	cv. M-201
4530	Oryza sativa	cv. M-202
4530	Oryza sativa	cv. Maratelli
4530	Oryza sativa	cv. Milyang 23
4530	Oryza sativa	cv. Minghui 63	cv. MH63
4530	Oryza sativa	cv. Moroberecan
4530	Oryza sativa	cv. Moukoto
4530	Oryza sativa	cv. N 22
4530	Oryza sativa	cv. Nagdong
4530	Oryza sativa	cv. Nakdong
4530	Oryza sativa	cv. Nakdongbyeo
4530	Oryza sativa	cv. NIL127
4530	Oryza sativa	cv. Nipponbare
4530	Oryza sativa	cv. PB1
4530	Oryza sativa	cv. Pokkali
4530	Oryza sativa	cv. Sadu-cho
4530	Oryza sativa	cv. Saeilmi
4530	Oryza sativa	cv. Sariceltik
4530	Oryza sativa	cv. Sasanishiki
4530	Oryza sativa	cv. Sasanishiki BL6
4530	Oryza sativa	cv. Shanyou 63
4530	Oryza sativa	cv. Shin No. 2
4530	Oryza sativa	cv. SHZ2
4530	Oryza sativa	cv. Swarna
4530	Oryza sativa	cv. Taichung Native 1
4530	Oryza sativa	cv. Tainung 67
4530	Oryza sativa	cv. Taipei 309	cv. TP309
4530	Oryza sativa	cv. Taipei309
4530	Oryza sativa	cv. Teyou 63
4530	Oryza sativa	cv. Trenasse
4530	Oryza sativa	cv. Tsuyuake
4530	Oryza sativa	cv. Wanxian 98
4530	Oryza sativa	cv. Xiushui 134
4530	Oryza sativa	cv. Yashiro-mochi
4530	Oryza sativa	cv. YT16
4530	Oryza sativa	cv. Zhenshan 97B
4530	Oryza sativa	cv. Zhonghua 11
4530	Oryza sativa	IR24 line
4530	Oryza sativa	IR31917 line
4530	Oryza sativa	P2
4530	Oryza sativa	rayada group
4530	Oryza sativa	subsp. Xian cv. IR24	cv. IR24
4530	Oryza sativa	var. glutinosa cv. Blanco	cv. Blanco
9940	Ovis aries	Lacaune
4031	Pelargonium x hortorum	cv. Anthony
3435	Persea americana	cv. Fuerte
3885	Phaseolus vulgaris	cv. 90598
3885	Phaseolus vulgaris	cv. Blanca
3885	Phaseolus vulgaris	cv. Blanca Riñón
3885	Phaseolus vulgaris	cv. Blue Lake 274
3885	Phaseolus vulgaris	cv. Bush Blue Lake 274
3885	Phaseolus vulgaris	cv. Bush Blue Lake 47
3885	Phaseolus vulgaris	cv. Canadian Wonder
3885	Phaseolus vulgaris	cv. Caruso
3885	Phaseolus vulgaris	cv. Contender
3885	Phaseolus vulgaris	cv. Great Northern Tara
3885	Phaseolus vulgaris	cv. Hiltrud
3885	Phaseolus vulgaris	cv. N90598
3885	Phaseolus vulgaris	cv. Red Mexican
3885	Phaseolus vulgaris	cv. Rosinha
3885	Phaseolus vulgaris	cv. Saxa
3885	Phaseolus vulgaris	cv. Soldier
3885	Phaseolus vulgaris	cv. Tendergreen
3885	Phaseolus vulgaris	cv. Venus
90988	Pimephales promelas	EPC cell line	Epithelioma Papulosum Cyprini	CVCL_4361
3888	Pisum sativum	cv. Guido
3888	Pisum sativum	cv. Lifter
3888	Pisum sativum	cv. PI240515
43335	Populus alba	cv. Marte
3690	Populus x canadensis	cv. 74/76
3690	Populus x canadensis	cv. Nanlin 895
9310	Potorous tridactylus	PtK2 cell line	NBL-5, NBL5, Potorous tridactylus Kidney 2, PtK2	BTO:0002282, CVCL_0514
3758	Prunus domestica	cv. Santa Rosa
3760	Prunus persica	cv. Fei Cheng
3760	Prunus persica	cv. Sun Snow
3760	Prunus persica	cv. Tian Tao
23211	Pyrus communis	cv. Bartlett
23211	Pyrus communis	cv. Bosc
23211	Pyrus communis	cv. Conférence
23211	Pyrus communis	cv. Cuiguan
23211	Pyrus communis	cv. Devoe
23211	Pyrus communis	cv. Huangguan
23211	Pyrus communis	cv. Nijisseiki
23211	Pyrus communis	cv. Passe
23211	Pyrus communis	cv. Pyrus bretschneideri Rehd
3767	Pyrus pyrifolia	cv. Nijisseiki
3726	Raphanus sativus	cv. Manshenhong
10116	Rattus norvegicus	NRK-49F cell line	NRK clone 49F, NRK49F, Normal Rat Kidney-49F	BTO:0002409, CVCL_2144
10116	Rattus norvegicus	Wistar
10117	Rattus rattus	Sprague-Dawley
10117	Rattus rattus	Wistar
2843217	Rhaphiolepis bibas	cv. Tanaka
267246	Rosa odorata	cv. Flaming Peace
4547	Saccharum officinarum	cv. CP68-1026
4547	Saccharum officinarum	cv. Heiganzhe
4550	Secale cereale	common winter rye
4550	Secale cereale	cv. Lo37-PxLo55-N
4108	Solanum chacoense	cv. C9701
4081	Solanum lycopersicum	90E341F line
4081	Solanum lycopersicum	cv. 1402
4081	Solanum lycopersicum	cv. Aibou
4081	Solanum lycopersicum	cv. Ailsa Craig
4081	Solanum lycopersicum	cv. Avigail
4081	Solanum lycopersicum	cv. Bonny Best
4081	Solanum lycopersicum	cv. C32
4081	Solanum lycopersicum	cv. Castlemart
4081	Solanum lycopersicum	cv. Corbarino
4081	Solanum lycopersicum	cv. Craigella
4081	Solanum lycopersicum	cv. Daniela
4081	Solanum lycopersicum	cv. Encore
4081	Solanum lycopersicum	cv. Farmer 301
4081	Solanum lycopersicum	cv. GCR161
4081	Solanum lycopersicum	cv. Glamour
4081	Solanum lycopersicum	cv. Hawaii 7996
4081	Solanum lycopersicum	cv. Hawaii 7998
4081	Solanum lycopersicum	cv. Hongfen
4081	Solanum lycopersicum	cv. Hongyangli
4081	Solanum lycopersicum	cv. Kwang-Bok
4081	Solanum lycopersicum	cv. Kwang-Soo
4081	Solanum lycopersicum	cv. LA3940
4081	Solanum lycopersicum	cv. Maofen-802
4081	Solanum lycopersicum	cv. Marmande
4081	Solanum lycopersicum	cv. Marmande VR
4081	Solanum lycopersicum	cv. Moneymaker
4081	Solanum lycopersicum	cv. Moneymaker C32
4081	Solanum lycopersicum	cv. Moneymaker Cf-0
4081	Solanum lycopersicum	cv. Moneymaker ss590
4081	Solanum lycopersicum	cv. Monika
4081	Solanum lycopersicum	cv. Motelle
4081	Solanum lycopersicum	cv. Ontario 7716
4081	Solanum lycopersicum	cv. Ontario 7818
4081	Solanum lycopersicum	cv. Paradiser
4081	Solanum lycopersicum	cv. Platense
4081	Solanum lycopersicum	cv. Ponderosa
4081	Solanum lycopersicum	cv. Potentate
4081	Solanum lycopersicum	cv. Purdue 135
4081	Solanum lycopersicum	cv. Pusa Ruby
4081	Solanum lycopersicum	cv. Rio Grande
4081	Solanum lycopersicum	cv. Rio Grande 76S
4081	Solanum lycopersicum	cv. Rome
4081	Solanum lycopersicum	cv. Seokwang
4081	Solanum lycopersicum	cv. Shanghai 903
4081	Solanum lycopersicum	cv. Sonatine
4081	Solanum lycopersicum	cv. Summer sweet
4081	Solanum lycopersicum	cv. Super Marmande
4081	Solanum lycopersicum	cv. UC82b
4081	Solanum lycopersicum	cv. Vemar
4081	Solanum lycopersicum	cv. Vetomold
4081	Solanum lycopersicum	cv. VF36
4081	Solanum lycopersicum	cv. Xinjinfeng no. 1	cv. Xinjinfeng 1
4081	Solanum lycopersicum	Msk8 cell line
4081	Solanum lycopersicum	Never-ripe mutant
4081	Solanum lycopersicum	race 1
4111	Solanum melongena	cv. AG91-25
4111	Solanum melongena	cv. Agassaim
4111	Solanum melongena	cv. Black Beauty
4111	Solanum melongena	cv. Ceylan
4111	Solanum melongena	cv. Dingras Multiple Purple
4111	Solanum melongena	cv. SM6
4111	Solanum melongena	cv. Surya
4082	Solanum peruvianum	cv. Monica
4113	Solanum tuberosum	Cebeco44-31-5 line
4113	Solanum tuberosum	cv. Amandine
4113	Solanum tuberosum	cv. Ants
4113	Solanum tuberosum	cv. Bintje
4113	Solanum tuberosum	cv. Bionika
4113	Solanum tuberosum	cv. Chippewa
4113	Solanum tuberosum	cv. Daeji
4113	Solanum tuberosum	cv. Desiree
4113	Solanum tuberosum	cv. E-Potato 3
4113	Solanum tuberosum	cv. Erika
4113	Solanum tuberosum	cv. Hopyung
4113	Solanum tuberosum	cv. Impala
4113	Solanum tuberosum	cv. Irga
4113	Solanum tuberosum	cv. Kennebec
4113	Solanum tuberosum	cv. Longshu7
4113	Solanum tuberosum	cv. Maris Piper
4113	Solanum tuberosum	cv. Qingshu9
4113	Solanum tuberosum	cv. Ranger Russet
4113	Solanum tuberosum	cv. Russet Norkotah
4113	Solanum tuberosum	cv. Valor
4113	Solanum tuberosum	cv. Van Gogh
4113	Solanum tuberosum	cv. Vineta
4113	Solanum tuberosum	cv. Yukon Gold
4113	Solanum tuberosum	HP10-45
7108	Spodoptera frugiperda	cv. Sf9
9823	Sus scrofa	hTERT-PBEC cell line	hTERT-immortalized Porcine Bronchial Epithelial Cells	CVCL_VN10
9823	Sus scrofa	hTERT-PTECs cell line	hTERT-immortalized Porcine Tracheal Epithelial Cells	CVCL_A2EY
9823	Sus scrofa	IPEC-J2 cell line	IPECJ2, Intestinal Porcine Epithelial Cell line-J2	BTO:0006402, CVCL_2246
9823	Sus scrofa	Mini-Lewe
9823	Sus scrofa	NPTr cell line	Newborn Pig Trachea	CVCL_8376
9823	Sus scrofa	PBMECs	Porcine Brain Microvascular Endothelial Cells
9823	Sus scrofa	PIEC	Porcine Iliac Endothelial Cells
9823	Sus scrofa	PK-15 cell line	PK15, Porcine Kidney-15	BTO:0001865, CVCL_2160
9823	Sus scrofa	SJPL	St. Jude Porcine Lung	CVCL_1T04
9823	Sus scrofa	SPF	Specific Pathogen-Free
9823	Sus scrofa	York-Landrace
7111	Trichoplusia ni	BTI-Tn-5B1-4 cell line	5B1-4, BTI-Tn, BTITn5B14, Hi 5, Hi Five, High 5, High Five, Tn-5, Tn-5B1-4, TnH5	BTO:0003619, CVCL_C190
4565	Triticum aestivum	cv. 6B365
4565	Triticum aestivum	cv. 6B662
4565	Triticum aestivum	cv. Aikang 58
4565	Triticum aestivum	cv. Amaretto
4565	Triticum aestivum	cv. Annong 8455
4565	Triticum aestivum	cv. Apogee
4565	Triticum aestivum	cv. Auburn
4565	Triticum aestivum	cv. Avalon
4565	Triticum aestivum	cv. Axe
4565	Triticum aestivum	cv. Bainong 979
4565	Triticum aestivum	cv. Barlow
4565	Triticum aestivum	cv. Bess
4565	Triticum aestivum	cv. BG220
4565	Triticum aestivum	cv. Bobwhite
4565	Triticum aestivum	cv. BR34
4565	Triticum aestivum	cv. Brennan
4565	Triticum aestivum	cv. Briggs
4565	Triticum aestivum	cv. Cadenza
4565	Triticum aestivum	cv. Calingiri
4565	Triticum aestivum	cv. Cerco
4565	Triticum aestivum	cv. Chancellor
4565	Triticum aestivum	cv. Chinese Spring
4565	Triticum aestivum	cv. Corack
4565	Triticum aestivum	cv. Drifter
4565	Triticum aestivum	cv. Emu Rock
4565	Triticum aestivum	cv. Erik
4565	Triticum aestivum	cv. Eunpamil
4565	Triticum aestivum	cv. Fielder
4565	Triticum aestivum	cv. Gabo
4565	Triticum aestivum	cv. Galaxie
4565	Triticum aestivum	cv. Glenlea
4565	Triticum aestivum	cv. Glenn
4565	Triticum aestivum	cv. Grandin
4565	Triticum aestivum	cv. Guomai 301
4565	Triticum aestivum	cv. Halberd
4565	Triticum aestivum	cv. Harry
4565	Triticum aestivum	cv. Howard
4565	Triticum aestivum	cv. Huaimai 13
4565	Triticum aestivum	cv. Huaimai 33
4565	Triticum aestivum	cv. Iride
4565	Triticum aestivum	cv. Jenna
4565	Triticum aestivum	cv. Jimai 19
4565	Triticum aestivum	cv. Jimai 22
4565	Triticum aestivum	cv. Jimai 33
4565	Triticum aestivum	cv. Kadrilj
4565	Triticum aestivum	cv. Kelby
4565	Triticum aestivum	cv. Kennedy
4565	Triticum aestivum	cv. Mace
4565	Triticum aestivum	cv. McNair 701
4565	Triticum aestivum	cv. Mingxian 169
4565	Triticum aestivum	cv. Mott
4565	Triticum aestivum	cv. Nandu
4565	Triticum aestivum	cv. ND495
4565	Triticum aestivum	cv. Ning 7840
4565	Triticum aestivum	cv. Norm
4565	Triticum aestivum	cv. Obelisk
4565	Triticum aestivum	cv. Prosper
4565	Triticum aestivum	cv. Qingmai 6
4565	Triticum aestivum	cv. RB07
4565	Triticum aestivum	cv. Riband
4565	Triticum aestivum	cv. Roblin
4565	Triticum aestivum	cv. Rollag
4565	Triticum aestivum	cv. Rosella
4565	Triticum aestivum	cv. Russ
4565	Triticum aestivum	cv. Salamouni
4565	Triticum aestivum	cv. Select
4565	Triticum aestivum	cv. Shuiyuan 11	cv. Su11
4565	Triticum aestivum	cv. Spring wheat
4565	Triticum aestivum	cv. Steele-ND
4565	Triticum aestivum	cv. Sumai 3
4565	Triticum aestivum	cv. Suwon 11
4565	Triticum aestivum	cv. SY Soren
4565	Triticum aestivum	cv. SY Tyra
4565	Triticum aestivum	cv. Thatcher-Sr31
4565	Triticum aestivum	cv. Vantage
4565	Triticum aestivum	cv. Velva
4565	Triticum aestivum	cv. W-7984
4565	Triticum aestivum	cv. Wesley
4565	Triticum aestivum	cv. Wheaton
4565	Triticum aestivum	cv. Xiaoyan 22
4565	Triticum aestivum	cv. Yangmai 158
4565	Triticum aestivum	cv. Yangmai 49
4565	Triticum aestivum	cv. Zhengmai
4565	Triticum aestivum	cv. Zhenmai
4565	Triticum aestivum	cv. Zhenmai 10
4565	Triticum aestivum	cv. Zhenmai 5
4565	Triticum aestivum	cv. Zhongyuan 98-68
4565	Triticum aestivum	cv. Zhoumai 24
4565	Triticum aestivum	cv. Zhoumai 26
4565	Triticum aestivum	cv. Zimai 1
4565	Triticum aestivum	cv. Zimai 22
4566	Triticum aestivum x Triticum timopheevi	cv. Nandu
4566	Triticum aestivum x Triticum timopheevi	cv. Norm
4566	Triticum aestivum x Triticum timopheevi	cv. Zimai 2
4571	Triticum turgidum	cv. Alkabo
4571	Triticum turgidum	cv. Ben
4571	Triticum turgidum	cv. Carpio
4571	Triticum turgidum	cv. Dilse
4571	Triticum turgidum	cv. Divide
4571	Triticum turgidum	cv. Grenora
4571	Triticum turgidum	cv. Langdon
4571	Triticum turgidum	cv. Lebsock
4571	Triticum turgidum	cv. Mountrail
4571	Triticum turgidum	cv. Pierce
4571	Triticum turgidum	cv. Rusty
4571	Triticum turgidum	cv. Tioga
29760	Vitis vinifera	cv. Cabernet Sauvignon
29760	Vitis vinifera	cv. Carignane
29760	Vitis vinifera	cv. Chardonnay
29760	Vitis vinifera	cv. Thompson Seedless
29760	Vitis vinifera	cv. Zani
94108	Zantedeschia elliottiana	cv. Black Magic
4577	Zea mays	cv. A188
4577	Zea mays	cv. B73
4577	Zea mays	cv. B75
4577	Zea mays	cv. Cacahuazintle
4577	Zea mays	cv. CML247
4577	Zea mays	cv. CML264
4577	Zea mays	cv. CML277
4577	Zea mays	cv. CML52
4577	Zea mays	cv. CML9
4577	Zea mays	cv. Creek White
4577	Zea mays	cv. Early Golden Bantam
4577	Zea mays	cv. EGB
4577	Zea mays	cv. FS8A
4577	Zea mays	cv. FS8B
4577	Zea mays	cv. G80
4577	Zea mays	cv. GEMS-0009
4577	Zea mays	cv. Golden Bantam
4577	Zea mays	cv. Golden Jubilee
4577	Zea mays	cv. GS73CO
4577	Zea mays	cv. H116
4577	Zea mays	cv. Huangzao 4
4577	Zea mays	cv. Jubilee
4577	Zea mays	cv. Mikado
4577	Zea mays	cv. ML287
4577	Zea mays	cv. Nathan
4577	Zea mays	cv. ND101
4577	Zea mays	cv. ND253
4577	Zea mays	cv. ND257
4577	Zea mays	cv. ND301
4577	Zea mays	cv. NYRD4058
4577	Zea mays	cv. P737M20
4577	Zea mays	cv. Pa760
4577	Zea mays	cv. Pa91
4577	Zea mays	cv. Pioneer 2375
4577	Zea mays	cv. Pioneer 33D47
4577	Zea mays	cv. R225
4577	Zea mays	cv. SD40
4577	Zea mays	cv. SD43
4577	Zea mays	cv. SD44
4577	Zea mays	cv. SD45
4577	Zea mays	cv. Seneca Horizon
4577	Zea mays	cv. Silver Queen
4577	Zea mays	cv. Takanestar
4577	Zea mays	cv. Truckers Favorite
4577	Zea mays	cv. W23
4577	Zea mays	cv. W570
4577	Zea mays	cv. W64A
4577	Zea mays	cv. W64A-N	cv. W64AN
4577	Zea mays	cv. W64A-T	cv. W64AT
4577	Zea mays	cv. W64ARpp9
4577	Zea mays	cv. Xianyu 335
4577	Zea mays	UH002 line
